# Supplementary material for: Point-of-care lung ultrasonography for early identification of mild COVID-19: a prospective cohort of outpatients in a Swiss screening center
Source: PubMed Central journal article supplement (PMC9234434; doi:10.1136/bmjopen-2021-060181), 2022-06-23
Supplement: bmjopen-2021-060181.draft_revisions.pdf [file bmjopen-2021-060181.draft_revisions.pdf]

# BMJ Open

BMJ Open is committed to open peer review. As part of this commitment we make the peer review history of every article we publish publicly available.

When an article is published we post the peer reviewers' comments and the authors' responses online. We also post the versions of the paper that were used during peer review. These are the versions that the peer review comments apply to.

The versions of the paper that follow are the versions that were submitted during the peer review process. They are not the versions of record or the final published versions. They should not be cited or distributed as the published version of this manuscript.

BMJ Open is an open access journal and the full, final, typeset and author-corrected version of record of the manuscript is available on our site with no access controls, subscription charges or pay-per-view fees (<http://bmjopen.bmj.com>).

If you have any questions on BMJ Open's open peer review process please email [info.bmjopen@bmj.com](mailto:info.bmjopen@bmj.com)

# BMJ Open

## Point-of-care lung ultrasonography for early identification of mild COVID-19: a prospective cohort of outpatients in a Swiss screening center

|                               |                                                                                                                                                                                                                                                                                                                                                                                                                                                                                                                                                                                                                                                                                                                                                                                                                                                |
|-------------------------------|------------------------------------------------------------------------------------------------------------------------------------------------------------------------------------------------------------------------------------------------------------------------------------------------------------------------------------------------------------------------------------------------------------------------------------------------------------------------------------------------------------------------------------------------------------------------------------------------------------------------------------------------------------------------------------------------------------------------------------------------------------------------------------------------------------------------------------------------|
| Journal:                      | <i>BMJ Open</i>                                                                                                                                                                                                                                                                                                                                                                                                                                                                                                                                                                                                                                                                                                                                                                                                                                |
| Manuscript ID                 | bmjopen-2021-060181                                                                                                                                                                                                                                                                                                                                                                                                                                                                                                                                                                                                                                                                                                                                                                                                                            |
| Article Type:                 | Original research                                                                                                                                                                                                                                                                                                                                                                                                                                                                                                                                                                                                                                                                                                                                                                                                                              |
| Date Submitted by the Author: | 14-Dec-2021                                                                                                                                                                                                                                                                                                                                                                                                                                                                                                                                                                                                                                                                                                                                                                                                                                    |
| Complete List of Authors:     | Schaad, Siméon; Lausanne University Hospital<br>Brahier, Thomas; Lausanne University Hospital<br>HARTLEY, Mary-Anne; University of Lausanne, Digital global Health Department; EPFL<br>CORDONNIER, Jean-Baptiste; EPFL<br>BOSSO, Luca; Lausanne University Hospital Emergency Care Service, Emergency Department<br>ESPEJO, Tanguy; Lausanne University Hospital Emergency Care Service, Emergency Department<br>PANTET, Olivier; Lausanne University Hospital Adult Intensive Care Unit<br>Hugli, Olivier; University Hospital of Lausanne, Emergency department<br>Carron, Pierre-Nicolas; Centre Hospitalier Universitaire Vaudois, Emergency<br>MEUWLY, Jean-Yves; Lausanne University Hospital Division of Radio-diagnostics and Interventional Radiology, Department of Radiology<br>Boillat-Blanco, Noémie; Infectious Diseases Service |
| Keywords:                     | COVID-19, ULTRASONOGRAPHY, Diagnostic radiology < RADIOLOGY & IMAGING, INFECTIOUS DISEASES                                                                                                                                                                                                                                                                                                                                                                                                                                                                                                                                                                                                                                                                                                                                                     |
|                               |                                                                                                                                                                                                                                                                                                                                                                                                                                                                                                                                                                                                                                                                                                                                                                                                                                                |

SCHOLARONE™  
Manuscripts

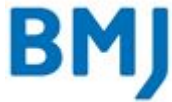

I, the Submitting Author has the right to grant and does grant on behalf of all authors of the Work (as defined in the below author licence), an exclusive licence and/or a non-exclusive licence for contributions from authors who are: i) UK Crown employees; ii) where BMJ has agreed a CC-BY licence shall apply, and/or iii) in accordance with the terms applicable for US Federal Government officers or employees acting as part of their official duties; on a worldwide, perpetual, irrevocable, royalty-free basis to BMJ Publishing Group Ltd ("BMJ") its licensees and where the relevant Journal is co-owned by BMJ to the co-owners of the Journal, to publish the Work in this journal and any other BMJ products and to exploit all rights, as set out in our [licence](#).

The Submitting Author accepts and understands that any supply made under these terms is made by BMJ to the Submitting Author unless you are acting as an employee on behalf of your employer or a postgraduate student of an affiliated institution which is paying any applicable article publishing charge ("APC") for Open Access articles. Where the Submitting Author wishes to make the Work available on an Open Access basis (and intends to pay the relevant APC), the terms of reuse of such Open Access shall be governed by a Creative Commons licence – details of these licences and which [Creative Commons](#) licence will apply to this Work are set out in our licence referred to above.

Other than as permitted in any relevant BMJ Author's Self Archiving Policies, I confirm this Work has not been accepted for publication elsewhere, is not being considered for publication elsewhere and does not duplicate material already published. I confirm all authors consent to publication of this Work and authorise the granting of this licence.

1 **Point-of-care lung ultrasonography for early identification of mild COVID-19: a**  
2 **prospective cohort of outpatients in a Swiss screening center**

3  
4  
5  
6  
7  
8  
9  
10 Siméon SCHAAD<sup>1\*†</sup>, Thomas BRAHIER<sup>1\*</sup>, Mary-Anne HARTLEY<sup>2,3</sup>, Jean-Baptiste  
11 CORDONNIER<sup>3</sup>, Luca BOSSO<sup>5</sup>, Tanguy ESPEJO<sup>5</sup>, Olivier PANTET<sup>4</sup>, Olivier HUGLI<sup>5</sup>,  
12 Pierre-Nicolas CARRON<sup>5</sup>, Jean-Yves MEUWLY<sup>6\*</sup>, Noémie BOILLAT-BLANCO<sup>1\*</sup>  
13  
14  
15  
16

17  
18  
19 \*Equal contribution to this work

20  
21 †Corresponding author

22  
23  
24 **Key words:** COVID-19, lung ultrasound, screening, outpatients

25  
26 <sup>1</sup> Infectious Diseases Service, University Hospital of Lausanne, Switzerland; <sup>2</sup> Digital global  
27 Health Department, Center for primary care and public health, University of Lausanne,  
28 Switzerland; <sup>3</sup> Machine Learning and Optimization Laboratory, EPFL, Switzerland; <sup>4</sup> Intensive  
29 Care Unit, University Hospital of Lausanne, Switzerland; <sup>5</sup> Emergency Department, University  
30 Hospital of Lausanne, Switzerland; <sup>6</sup> Department of Radiology, University Hospital of  
31 Lausanne, Switzerland.  
32  
33  
34  
35  
36  
37  
38  
39  
40  
41

42 **Contact information:** Siméon Schaad, Service of Infectious Diseases, University Hospital of  
43 Lausanne (CHUV), Rue du Bugnon 46, 1011 Lausanne, Switzerland, Phone: +41 79 524 15  
44 85, E-mail: [simeon.schaad@unil.ch](mailto:simeon.schaad@unil.ch)  
45  
46

47 **Word count :** [3435](#)

48  
49  
50  
51 **Funding and support:** this work was supported by the Leenards foundation and by Lausanne  
52 University Hospital  
53  
54  
55

56  
57

58  
59  
60



1  
2  
3 51 **Conclusions**  
4

5 52 COVID<sup>pos</sup> patients are significantly more likely to have lung pathology by LUS. However, LUS  
6  
7 53 has a insufficient sensitivity and is not an appropriate screening tool in outpatients. LUS only  
8  
9 54 adds little value to clinical features alone.  
10  
11

12 55

13  
14 56 **Strengths and limitations of this study**  
15

- 16  
17 57 • This is the first study assessing the diagnostic performance of LUS for COVID-19 in  
18  
19 58 outpatients with mild acute respiratory tract infection. Acquisition and interpretation  
20  
21 59 of LUS images and videos were standardized.  
22  
23  
24 60 • Ultrasound experts interpreted all LUS image and videos.  
25  
26 61 • The study population consisted mainly of young and healthy healthcare workers , which  
27  
28 62 prevents extrapolation of our results to an older and comorbid population.  
29  
30

31 63  
32  
33  
34  
35  
36  
37  
38  
39  
40  
41  
42  
43  
44  
45  
46  
47  
48  
49  
50  
51  
52  
53  
54  
55  
56  
57  
58  
59  
60

## 64 **Introduction**

65 A year into the pandemic, Coronavirus Disease (COVID-19) remains a constant threat,  
66 overburdening the healthcare system. Current molecular diagnostic tests such as PCR and rapid  
67 antigen/antibody tests rely on consumables, which are vulnerable to shortages and saturation  
68 during exponential demand. The use of lung imaging as a diagnostic tool for COVID-19 has  
69 shown promises. Chest CT has a good sensitivity for patients triaged in emergency departments  
70 [1,2] and has even been able to detect pathology in asymptomatic cases, suggesting its potential  
71 as an early screening test in specific populations [3–5]. However, CT and even X-rays expose  
72 patients to ionizing radiation, are costly, and often not available in decentralized screening sites.  
73 Lung ultrasonography (LUS) is an alternative, consumable-free, easy-to-use, portable, non-  
74 radiating and non-invasive screening tool that can be performed at the bedside, with simple  
75 disinfection between patients and only a negligible cost of ultrasound gel as a consumable. It  
76 would allow immediate identification of infected patients at the point-of-care and be invaluable  
77 to the sustainable control of the pandemic. Its diagnostic performance for pneumonia has been  
78 established using chest CT as a gold standard [6]. For COVID-19, recent studies conducted in  
79 emergency departments showed several LUS patterns ranging from mild interstitial infiltrate,  
80 to lung consolidation, which correlated with disease progression and outcome [7,8]. However,  
81 these studies included mostly severe patients in emergency departments or intensive care units,  
82 which may lead to overoptimistic diagnostic performance of LUS due to a spectrum effect [9].  
83 To our knowledge, no studies have described LUS findings in subjects with mild COVID-19.  
84 This study aims to compare LUS characteristics between SARS-CoV-2 PCR-confirmed  
85 (COVID<sup>pos</sup>) and PCR-negative (COVID<sup>neg</sup>) patients in a screening center and explore LUS  
86 performance for identification of COVID-19 outpatients.

## 87 **Methods**

### 88 ***Study design, setting and population***

89 This prospective cohort study recruited consecutive outpatients at the COVID-19 screening  
90 center in Lausanne University Hospital, Switzerland (CHUV) between March 31<sup>st</sup> and May 8<sup>th</sup>  
91 2020. All adults (age  $\geq$  18 years) presenting at the center with cough and/or dyspnea and who  
92 fulfilled eligibility criteria for nasopharyngeal SARS-CoV-2 real time (Rt-) PCR according to  
93 the State recommendations at the time of the study were eligible. These State criteria were the  
94 presence of symptoms suggestive of COVID in a health worker or a subject with at least one  
95 vulnerability criterion, *i.e.* age  $\geq$  65 years old or having at least one comorbidity (obesity,  
96 diabetes, active cancer, chronic cardiovascular, pulmonary, liver, renal or inflammatory  
97 disease). Exclusion criteria were uninterpretable Rt-PCR results or absence of LUS recording.  
98 Written informed consent was obtained from all participants.

99 To ensure that LUS abnormal findings would be specific of a respiratory tract infection, we  
100 included a control group of healthy volunteers, matched for age ( $\pm$  5 years), sex, and smoking  
101 status with COVID<sup>pos</sup> patients (Supplementary Table 1). These volunteers were asymptomatic  
102 during the previous 15 days (absence of odynophagia, cough, dyspnea, runny nose, fever, loss  
103 of smell or taste) and did not have a documented SARS-CoV-2 infection.

104 At inclusion, demographics, comorbidities, symptoms (including duration), and vital signs were  
105 collected using a standardized electronic case report form in REDCap® (Research Electronic  
106 Data Capture). Patients were subsequently classified as either COVID<sup>pos</sup> or COVID<sup>neg</sup>  
107 according to the SARS-CoV-2 RT-PCR results (at inclusion or at any time during the 30-day  
108 follow-up if the test was repeated for the same clinical episode). We assessed 30-day outcome  
109 by phone using a standardized interview (persistence of symptoms, secondary medical  
110 consultation, hospital admission, death). The healthy controls were classified in a third group  
111 (healthy control group).



1  
2  
3 112 ***Research ethics approval***  
4

5 113 The study was approved by the Swiss Ethics Committee of the canton of Vaud (CER-VD 2019-  
6  
7 114 02283).  
8  
9

10 115 ***Patient and public involvement***  
11

12 116 Subjects were not involved in the design or conduct of this study.  
13

14 117 ***Sample size***  
15

16 118 The minimum sample size required for this study was 100 patients with a clinical suspicion of  
17  
18 119 COVID. It was calculated using a COVID prevalence of 20% and an estimated sensitivity of  
19  
20 120 LUS to identify COVID<sup>POS</sup> at 80%. This sample size guarantees a power of 80% with a false  
21  
22 121 discovery rate of 5% [10].  
23  
24  
25

26 122 ***Lung ultrasonography***  
27

28 123 Three medical students performed image acquisitions in the triage site. They were trained in  
29  
30 124 LUS images acquisition with a 1-hour e-learning course and a 1-hour face-to-face practical  
31  
32 125 course with an expert radiologist (JYM). The first 10 acquisitions were done under direct  
33  
34 126 supervision of an experienced board-certified expert (OP) who verified the quality of recorded  
35  
36 127 images. Acquisition was standardized according to the “10-zone method” [11,12], consisting  
37  
38 128 of five zones per hemithorax. Two images (sagittal and transverse) and 5 second videos were  
39  
40 129 systematically recorded in every zone with a Butterfly IQ<sup>TM</sup> personal US system (Butterfly,  
41  
42 130 Guiford, CT, USA), using the lung preset. The LUS probe and the electronic tablet were  
43  
44 131 disinfected with an alcohol-based solution between each patient to avoid nosocomial spread  
45  
46 132 [13].  
47  
48  
49  
50

51 133 For interpretation of LUS pathology, a physician experienced in LUS (TB) and an expert  
52  
53 134 radiologist (JYM), blinded to patients’ diagnoses, independently filled a standardized report  
54  
55 135 form as previously described [8]. The following patterns were reported for every zone: (1)  
56  
57 136 normal appearance (A lines, < 3 B lines), (2) pathologic B lines ( $\geq 3$  B lines), (3) confluent B  
58  
59  
60

1  
2  
3 137 lines, (4) thickening of the pleura with pleural line irregularities (subpleural consolidation < 1  
4  
5 138 cm) or (5) consolidation ( $\geq 1$  cm). The presence of pleural effusion was also recorded.

7 139 Discordance between the two readers were adjudicated by a third expert (OP). The abnormal  
8  
9 140 images were summed up in a LUS score for each patient, as previously described [8,14,15].

### 12 141 *Statistical analyses*

14 142 Differences between COVID<sup>pos</sup> and COVID<sup>neg</sup> patients for all collected demographic and  
16  
17 143 clinical features as well as LUS findings and LUS score were evaluated by Mann Whitney or  
18  
19 144 chi-squared test, as appropriate. A bilateral p value <0.05 was considered as indicative of  
20  
21 145 statistical significance. A multivariate logistic regression was built from 22, 15, 10 and 8  
22  
23 146 features using recursive feature elimination (RFE), originally including the following:

#### 26 147 **1) LUS findings (n=10)**

- 28 148 • Number of pathological zones for each of the five patterns (normal, pathological B lines,  
29 149 confluent B lines, pleural thickening, consolidation) (n=5)
- 31 150 • A dichotomized variable for the presence/absence of the above four pathological  
32 151 patterns detected (n=4)
- 34 152 • Binary variables for the presence of multifocal disease (n=1)

#### 40 153 **2) Symptoms at presentation (n=8)**

- 42 154 • Binary variables for the presence of cough, sputum, dyspnea, fever, anosmia,  
43 155 rhinorrhea, myalgia, and diarrhea

#### 47 156 **3) Vital signs (n=3)**

- 49 157 • Continuous variables for temperature, oxygen saturation, and respiratory rate

#### 52 158 **4) Epidemiological history (n=1)**

- 54 159 • Binary variable for a history of known unprotected contact with a COVID-19 case
- 55  
56  
57  
58  
59  
60

1  
2  
3 160 Feature coefficients are presented, as well as their importance in ranked order from RFE .  
4  
5 161 Performance at several stages of the RFE are reported, using the top 22, 15, 10 and 8 features.  
6  
7 162 Models using just LUS or just clinical findings were also built.  
8  
9  
10 163 Diagnostic performance is reported as sensitivity, specificity, positive and negative predictive  
11  
12 164 values (PPV, NPV), positive and negative likelihood ratios (LR+, LR-) and area under the  
13  
14 165 receiver-operator curve (AUC). Due to the dataset size, we report findings on the entire dataset.  
15  
16  
17 166 A diagnostic score was derived from the summed coefficients, normalized within a range from  
18  
19 167 -6 (COVID<sup>pos</sup> highly unlikely) to +4 (COVID<sup>pos</sup> highly likely) and the number of patients in  
20  
21 168 each class are presented for each value of the score. The optimal cut-point was chosen using  
22  
23  
24 169 Youden index [16].  
25  
26 170 The kappa coefficient was calculated to measure the inter-rater agreement between the two LUS  
27  
28 171 readers. R Core Team (2019) statistical software and python 3.0 with the sklearn library was  
29  
30 172 used for analyses. Similar analyses were attempted on the outcome at 30-day follow up but  
31  
32  
33 173 impossible due to the limited sample size.  
34  
35 174 The reporting of our results followed the STARD guidelines.  
36  
37  
38  
39  
40  
41  
42  
43  
44  
45  
46  
47  
48  
49  
50  
51  
52  
53  
54  
55  
56  
57  
58  
59  
60

## 175 **Results**

### 176 *Demographics and clinical presentation*

177 A total of 141 patients met inclusion criteria and were enrolled into the study; seven (5%) were  
178 later excluded, due to uninterpretable PCR results or LUS technical issues (hospital's network  
179 connection problems). Of the 134 remaining patients, 31 (23%) were classified as COVID<sup>pos</sup>  
180 and 103 (77%) as COVID<sup>neg</sup> based on Rt-PCR test. Among the 13 COVID<sup>neg</sup> patients who had  
181 a second screening test during the 30-day follow-up, only one had a positive SARS-CoV-2 Rt-  
182 PCR, related to a clearly distinct clinical episode. This patient was thus classified as COVID<sup>neg</sup>.  
183 Most patients were female (63%), healthcare workers (85%) with a median age of 35 years;  
184 most sought out testing within the first 5 days of symptom onset (Table 1). COVID<sup>pos</sup> patients  
185 had fewer comorbidities than COVID<sup>neg</sup>, the latter suffering mostly from asthma, obesity or  
186 hypertension. COVID<sup>pos</sup> patients presented more often with a history of fever and anosmia, but  
187 less often with dyspnea than COVID<sup>neg</sup> patients. Vital signs at inclusion were normal in most  
188 patients of both groups.

### 189 *Lung ultrasonography findings*

190 Lung ultrasound was abnormal in 31% of patients (Table 2). The two observers showed good  
191 concordance to differentiate a normal from an abnormal LUS, with a kappa of 0.67. Most  
192 anomalies were focal and unilateral. The most frequent patterns were pathologic B-lines and  
193 thickening of the pleura with pleural line irregularities. Only 9.1% of control subjects presented  
194 any abnormal finding on LUS, and all these anomalies were focal pathologic or confluent B  
195 lines (Supplementary Table 2).

196 Among all symptomatic patients, two factors were significantly associated with abnormal LUS:  
197 SARS-CoV-2 infection and history of fever (Table 3). Indeed, COVID<sup>pos</sup> patients had abnormal  
198 LUS findings significantly more frequently compared with COVID<sup>neg</sup> (45% versus 26%,  
199  $p=0.045$ ). However, this feature alone was poorly sensitive (45%) and specific (74%). No

1  
2  
3 200 specific ultrasonographic pattern on its own significantly distinguished COVID<sup>pos</sup> from  
4  
5 201 COVID<sup>neg</sup> subjects (Table 2).  
6

7 202 Although not statistically different, the proportion of COVID-19<sup>pos</sup> with abnormal LUS  
8  
9 203 findings was positively associated with symptoms duration. While only 30% of COVID-19<sup>pos</sup>  
10  
11 204 patients had abnormal LUS within 2 days of symptom onset, 52% of patients had pathological  
12  
13 205 LUS after 2 days (p=0.24).  
14

15  
16  
17 206 ***Multivariate diagnostic score.***

18  
19 207 We combined LUS findings with symptoms, vital signs and a binary feature for known contact  
20  
21 208 with a COVID-19 case to build a multivariate logistic regression diagnostic score. Using all  
22  
23 209 features, the score had 78.8% sensitivity, 84.0% specificity, 83.1% PPV, 61.4% NPV, 4.9 LR+,  
24  
25 210 0.3 LR- and 84.5% AUC (Figure 1). We present a plot on which to assess the score according  
26  
27 211 to a desired sensitivity/specificity trade-off.  
28

29  
30 212 In Table 4, score performance with several combinations of features at various stages of RFE  
31  
32 213 are presented. The strongest positive predictor was any evidence of pleural thickening at any  
33  
34 214 number of sites (coefficient: +0.69) with LUS, although it became a negative predictor with an  
35  
36 215 increasing number of sites with this feature (-0.40). The presence of pathological B lines and  
37  
38 216 confluent pathological B lines were also positively associated with COVID infection in this  
39  
40 217 score. All three of the above patterns were retained by RFE within the top seven features. The  
41  
42 218 LUS features that were negative and quickly eliminated by RFE were those describing  
43  
44 219 consolidation and multifocal pathology. Cough, fever and anosmia were the highest ranked  
45  
46 220 symptoms (coefficient  $\geq 0.4$ ), in line with previous reports. While LUS patterns were highly  
47  
48 221 ranked in the RFE, rerunning the model without LUS findings reduced AUC by only 4% (AUC  
49  
50 222 84.5% vs 80.3%). LUS findings were poorly sensitive in the absence of clinical features (AUC:  
51  
52 223 63.9% Sensitivity: 45.5%, Specificity: 77.3%, PPV: 66.7%, NPV: 55.6%, LR+: 2.0, LR-: 0.7).  
53  
54  
55  
56  
57  
58  
59  
60

1  
2  
3 224 Combining all 22 features and using RFE, we observe that removing 7 features had minimal  
4  
5 225 impact on score performance, and removing 12 features reduces AUC by only 4% compared to  
6  
7  
8 226 the original.

9  
10 227 ***30-day outcome***

11  
12 228 The 30-day follow-up was available for 121/134 (90%) patients. None was hospitalized or died  
13  
14 229 during follow-up. COVID<sup>pos</sup> patients had more frequently persistent symptoms (fatigue,  
15  
16  
17 230 dyspnea or anosmia) at 30-day compared with COVID<sup>neg</sup> (Table 1).

18  
19 231 The presence of an abnormal LUS at inclusion was not associated with symptom persistence  
20  
21 232 (Table 3).

22  
23  
24 233 As no patients were admitted or died, we could not analyze the value of LUS findings to predict  
25  
26 234 critical clinical outcome.

## 235 **Discussion**

236 Lung pathology is detectable by chest CT early in the course of COVID disease, even in  
237 asymptomatic patients, suggesting that lung imaging might have a place as a complementary  
238 diagnostic tool [3]. However, large scale CT screening is not feasible even in hospital settings  
239 with abundant resources. Point-of-care LUS is now affordable, portable and implementable in  
240 a decentralized setting and has all the attributes to become a pragmatic community-based  
241 screening tool.

242 We evaluated the diagnostic performance of LUS in a prospective cohort of subjects with mild  
243 acute respiratory tract infection attending a COVID-19 Swiss screening center. COVID<sup>pos</sup>  
244 outpatients more frequently had abnormal LUS findings at inclusion compared with COVID<sup>neg</sup>.  
245 However, LUS findings alone had insufficient sensitivity, NPV and LR- to recommend LUS as  
246 an independent screening tool in outpatients. The combination of both LUS and clinical features  
247 in a multivariate regression score showed that LUS features only adds little value to clinical  
248 features alone regarding the prediction of COVID-19.

249 The limited sensitivity of LUS in our population is discordant with previous studies, which  
250 showed a good sensitivity (89-97%) to identify Rt-PCR-confirmed COVID-19. These  
251 retrospective studies were conducted in emergency departments and included patients with  
252 severe and critical COVID-19 infection[17–19]. Other studies using chest CT also showed an  
253 excellent sensitivity (97-98%) to diagnose COVID-19 [2,20,21]. However, all these studies  
254 were conducted in hospitalized patients with severe or critical disease, preventing extrapolation  
255 to our milder population screened for symptoms only.

256 The clinical severity of the disease strongly affects the performance of diagnostic tests, and  
257 particularly the sensitivity of LUS. We conclude that while LUS may be an interesting COVID-  
258 19 screening tool in emergency departments, it is not reliable when used alone in patients with  
259 mild disease. In the only study investigating chest CT features in patients with asymptomatic

1  
2  
3 260 (73%) or mild (27%) COVID-19, which was conducted in the passengers of the cruise ship  
4  
5 261 *Diamond Princess*, 54% of asymptomatic patients and 79% of patients with mild disease  
6  
7 262 presented opacities on chest CT. These results suggested the potential use of chest CT in clinical  
8  
9 263 decision making [3]. Most opacities were located in the peripheral areas of the lung, where LUS  
10  
11 264 is performant. Patients included in the *Diamond Princess* study were older compared with our  
12  
13 265 study population (mean of  $63 \pm 15$  years vs.  $39 \pm 13$  years), a possible explanation for the lower  
14  
15 266 proportion of patients with lung involvement in our study.

16  
17 267 We observed more abnormal LUS findings in COVID<sup>POS</sup> patients who had more than 2 days of  
18  
19 268 symptoms (52% versus 30%), although our results were not statistically significant. Concordant  
20  
21 269 with our findings, a relationship between the duration of infection and the proportion of  
22  
23 270 abnormal radiological findings has been described [22–24]. In one study, only 44% of patients  
24  
25 271 presenting within 2 days of symptoms had an abnormal CT, while this proportion rose to 91%  
26  
27 272 after 3 to 5 days and 96% after 5 days [24]. This study did not provide any data on COVID-19  
28  
29 273 severity. In another study using chest X-ray in patients admitted to the emergency department,  
30  
31 274 the proportion of an abnormal chest X ray increased with the duration of symptoms (63% in the  
32  
33 275 first 2 days to 84% after 9 days) [25].

34  
35 276 In our study, most patients with abnormal LUS findings presented with focal pathologic B lines,  
36  
37 277 confluent B lines or pleural thickening, irrespective of the etiology of the acute respiratory tract  
38  
39 278 infection. Inclusion of healthy volunteers confirmed the causality between LUS findings and  
40  
41 279 acute respiratory tract infections. Indeed, only 9% of healthy volunteers presented LUS  
42  
43 280 anomalies (and all were focal pathologic B lines).

44  
45 281 Two previous study showed that thickened pleural lines on LUS were significantly associated  
46  
47 282 with COVID-19 [17,18]. However, in a third report, LUS findings were similar in both COVID-  
48  
49 283 19 and non-COVID-19 patients [19].

## 50 284 **Limitations**



1  
2  
3 285 Our study has some limitations. First, most of our subjects were healthy and young healthcare  
4  
5 286 workers, which prevents extrapolation of our results to an older and comorbid population.  
6  
7 287 However, young, healthy subjects are of a prime importance in the management of the virus  
8  
9 288 spread [26]. Second, SARS-CoV-2 Rt-PCR nasopharyngeal swab was used as the gold  
10  
11 289 standard, and we might have missed some early infections when it has limited sensitivity [27].  
12  
13 290 However, it is considered as the reference diagnostic method. Furthermore, we sought to  
14  
15 291 mitigate technical and sample collection error using validated nucleic acid amplification tests  
16  
17 292 and a dedicated trained medical team performing nasopharyngeal swabs [28]. In addition, we  
18  
19 293 had 30-day follow-up, which may have reduced the number of patients misclassified as  
20  
21 294 COVID<sup>neg</sup>. Third, medical students, and not ultrasound experts, performed LUS images and  
22  
23 295 videos acquisition. However, they had a focused training by experts and followed a  
24  
25 296 standardized image acquisition protocol. To better investigate the predictive potential of LUS  
26  
27 297 findings, we built a multivariate score. The small sample size and high feature count (n= 22)  
28  
29 298 exposes the model to the risk of overfitting. Thus, this score is not ready for clinical use, but  
30  
31 299 rather is a mean to demonstrate the feature importance by RFE.  
32  
33  
34  
35  
36  
37  
38  
39

300

### 301 **Conclusion**

302 To our knowledge, this is the first study, which assessed the use of LUS in a screening center  
303 outpatient population with mild COVID-19. As disease severity plays an important role in the  
304 ultrasonographic findings, LUS is poorly sensitive as a SARS-CoV-2 screening tool in the  
305 context of mild community-level screening.

306

1  
2  
3 307 **Declarations**  
4

5 308 **Funding**  
6

7 309 This work was supported by an academic award of the Leenaards Foundation (to NBB), by the  
8  
9  
10 310 Foundation of Lausanne University Hospital, and the Emergency Department Lausanne  
11  
12 311 University Hospital. The funding bodies had no role in the design of the study and collection,  
13  
14 312 analysis and interpretation of data and in writing the manuscript.  
15

16  
17 313 **Acknowledgements**  
18

19 314 We thank all the patients who accepted to participate and make this study possible. We thank  
20  
21 315 all healthcare workers of the triage unit of the emergency department of the University Hospital  
22  
23 316 of Lausanne, who supported the study and managed COVID-19 suspected patients.  
24  
25

26 317 **Author contributions**  
27

28 318 JYM, OH, PC, NBB: study conception, study design, study performance, study management,  
29  
30 319 data analysis, data interpretation and manuscript writing. SS, TB, JYM, OP: LUS images  
31  
32 320 review, data interpretation and critical review of the manuscript.  
33  
34

35 321 TE, LB: LUS images recording, data interpretation and critical review of the manuscript.  
36

37 322 MH, JC: data analysis, interpretation, visualisations and critical review of the manuscript.  
38

39  
40 323 All authors approved the final version of the manuscript and agreed to be accountable for all  
41  
42 324 aspects of the work in ensuring that questions related to the accuracy or integrity of any part of  
43  
44 325 the work are appropriately investigated and resolved.  
45

46 326 NBB had full access to all the data in the study and takes responsibility for the integrity of the  
47  
48 327 data and the accuracy of the data analysis.  
49  
50

51 328

52  
53 329 [Dataset available from https://zenodo.org/record/4617904#.Ya-gfi3pOu6](https://zenodo.org/record/4617904#.Ya-gfi3pOu6)  
54

55  
56 330 **Conflicts of interest:** none declared  
57

58 331  
59  
60

332 **References**

- 333 1 Guan W, Ni Z, Hu Y, Liang W, Ou C, He J, *et al.* Clinical Characteristics of  
 334 Coronavirus Disease 2019 in China. *N Engl J Med* 2020;**382**:1708–20.
- 335 2 Ai T, Yang Z, Hou H, Zhan C, Chen C, Lv W, *et al.* Correlation of Chest CT and RT-  
 336 PCR Testing in Coronavirus Disease 2019 (COVID-19) in China: A Report of  
 337 1014 Cases. *Radiology* 2020;:200642.
- 338 3 Inui S, Fujikawa A, Jitsu M, Kunishima N, Watanabe S, Suzuki Y, *et al.* Chest CT  
 339 Findings in Cases from the Cruise Ship “Diamond Princess” with Coronavirus  
 340 Disease 2019 (COVID-19). *Radiol Cardiothorac Imaging* 2020;**2**:e200110.
- 341 4 Shi H, Han X, Jiang N, Cao Y, Alwalid O, Gu J, *et al.* Radiological findings from 81  
 342 patients with COVID-19 pneumonia in Wuhan, China: a descriptive study. *Lancet Infect Dis*  
 343 2020;**20**:425–34.
- 344 5 Islam N, Salameh J-P, Leeftang MM, Hooft L, McGrath TA, van der Pol CB, *et al.*  
 345 Thoracic imaging tests for the diagnosis of COVID-19. *Cochrane Database Syst Rev*  
 346 2020;**11**:CD013639.
- 347 6 Orso D, Guglielmo N, Copetti R. Lung ultrasound in diagnosing pneumonia in the  
 348 emergency department: a systematic review and meta-analysis. *Eur J Emerg Med*  
 349 2018;**25**:312–21.
- 350 7 Peng Q-Y, Wang X-T, Zhang L-N. Findings of lung ultrasonography of novel corona  
 351 virus pneumonia during the 2019–2020 epidemic. *Intensive Care Med* 2020;:1–2.
- 352 8 Brahier T, Meuwly J-Y, Pantet O, Brochu Vez M-J, Gerhard Donnet H, Hartley M-A,  
 353 *et al.* Lung ultrasonography for risk stratification in patients with COVID-19: a prospective  
 354 observational cohort study. *Clin Infect Dis Off Publ Infect Dis Soc Am* Published Online First:  
 355 17 September 2020. doi:10.1093/cid/ciaa1408
- 356 9 Mulherin SA, Miller WC. Spectrum Bias or Spectrum Effect? Subgroup Variation in  
 357 Diagnostic Test Evaluation. *Ann Intern Med* 2002;**137**:598.
- 358 10 Bujang MA, Adnan TH. Requirements for Minimum Sample Size for Sensitivity and  
 359 Specificity Analysis. *J Clin Diagn Res JCDR* 2016;**10**:YE01–6.
- 360 11 Rambhia SH, D’Agostino CA, Noor A, Villani R, Naidich JJ, Pellerito JS. Thoracic  
 361 Ultrasound: Technique, Applications, and Interpretation. *Curr Probl Diagn Radiol*  
 362 2017;**46**:305–16.
- 363 12 Volpicelli G, Elbarbary M, Blaivas M, Lichtenstein DA, Mathis G, Kirkpatrick AW,  
 364 *et al.* International evidence-based recommendations for point-of-care lung ultrasound.  
 365 *Intensive Care Med* 2012;**38**:577–91.
- 366 13 AIUM. Guidelines for Cleaning and Preparing External- and Internal-Use Ultrasound  
 367 Transducers and Equipment Between Patients as well as Safe Handling and Use of  
 368 Ultrasound Coupling Gel. 2020.
- 369 14 Mayo PH, Copetti R, Feller-Kopman D, Mathis G, Maury E, Mongodi S, *et al.*  
 370 Thoracic ultrasonography: a narrative review. *Intensive Care Med* 2019;**45**:1200–11.
- 371 15 Soldati G, Smargiassi A, Inchingolo R, Buonsenso D, Perrone T, Briganti DF, *et al.*  
 372 Proposal for International Standardization of the Use of Lung Ultrasound for Patients With  
 373 COVID-19. *J Ultrasound Med*;n/a. doi:10.1002/jum.15285
- 374 16 Schisterman EF, Perkins NJ, Liu A, Bondell H. Optimal cut-point and its  
 375 corresponding Youden Index to discriminate individuals using pooled blood samples.  
 376 *Epidemiol Camb Mass* 2005;**16**:73–81.
- 377 17 Pare JR, Camelo I, Mayo KC, Leo MM, Dugas JN, Nelson KP, *et al.* Point-of-care  
 378 Lung Ultrasound Is More Sensitive than Chest Radiograph for Evaluation of COVID-19.  
 379 *West J Emerg Med* 2020;**21**:771–8.
- 380 18 Bar S, Lecourtois A, Diouf M, Goldberg E, Bourbon C, Arnaud E, *et al.* The

- 1  
2  
3 381 association of lung ultrasound images with COVID-19 infection in an emergency room  
4 382 cohort. *Anaesthesia* 2020;**75**:1620–5.
- 5 383 19 Sorlini C, Femia M, Nattino G, Bellone P, Gesu E, Francione P, *et al*. The role of lung  
6 384 ultrasound as a frontline diagnostic tool in the era of COVID-19 outbreak. *Intern Emerg Med*  
7 385 Published Online First: 22 October 2020. doi:10.1007/s11739-020-02524-8
- 8 386 20 Raptis CA, Hammer MM, Short RG, Shah A, Bhalla S, Bierhals AJ, *et al*. Chest CT  
9 387 and Coronavirus Disease (COVID-19): A Critical Review of the Literature to Date. *Am J*  
10 388 *Roentgenol* 2020;**215**:839–42.
- 11 389 21 Fang Y, Zhang H, Xie J, Lin M, Ying L, Pang P, *et al*. Sensitivity of Chest CT for  
12 390 COVID-19: Comparison to RT-PCR. *Radiology* 2020;**296**:E115–7.
- 13 391 22 Salehi S, Abedi A, Balakrishnan S, Gholamrezanezhad A. Coronavirus Disease 2019  
14 392 (COVID-19): A Systematic Review of Imaging Findings in 919 Patients. *Am J Roentgenol*  
15 393 2020;**215**:87–93.
- 16 394 23 Jin Y-H, Cai L, Cheng Z-S, Cheng H, Deng T, Fan Y-P, *et al*. A rapid advice  
17 395 guideline for the diagnosis and treatment of 2019 novel coronavirus (2019-nCoV) infected  
18 396 pneumonia (standard version). *Mil Med Res* 2020;**7**:4.
- 19 397 24 Bernheim A, Mei X, Huang M, Yang Y, Fayad ZA, Zhang N, *et al*. Chest CT Findings  
20 398 in Coronavirus Disease-19 (COVID-19): Relationship to Duration of Infection.  
21 399 *Radiology* 2020;**295**:200463.
- 22 400 25 Vancheri SG, Savietto G, Ballati F, Maggi A, Canino C, Bortolotto C, *et al*.  
23 401 Radiographic findings in 240 patients with COVID-19 pneumonia: time-dependence after the  
24 402 onset of symptoms. *Eur Radiol* 2020;**30**:6161–9.
- 25 403 26 Rivett L, Sridhar S, Sparkes D, Routledge M, Jones NK, Forrest S, *et al*. Screening of  
26 404 healthcare workers for SARS-CoV-2 highlights the role of asymptomatic carriage in COVID-  
27 405 19 transmission. *eLife* 2020;**9**. doi:10.7554/eLife.58728
- 28 406 27 Caruana G, Croxatto A, Coste AT, Opota O, Lamoth F, Jatton K, *et al*. Diagnostic  
29 407 strategies for SARS-CoV-2 infection and interpretation of microbiological results. *Clin*  
30 408 *Microbiol Infect* 2020;**26**:1178–82.
- 31 409 28 Opota O, Brouillet R, Greub G, Jatton K. Comparison of SARS-CoV-2 RT-PCR on a  
32 410 high-throughput molecular diagnostic platform and the cobas SARS-CoV-2 test for the  
33 411 diagnostic of COVID-19 on various clinical samples. *Pathog Dis* 2020;**78**:ftaa061.
- 34 412  
35  
36  
37  
38  
39  
40  
41 413  
42  
43  
44  
45  
46  
47  
48  
49  
50  
51  
52  
53  
54  
55  
56  
57  
58  
59  
60

1  
2  
3 414 **Figure Legend**  
4

5 415 **Figure 1.** A multivariate logistic regression diagnostic score (x-axis) to discriminate COVID<sup>pos</sup>  
6  
7 416 from COVID<sup>neg</sup> patients (black and white bars respectively with count on y axis). Sensitivity  
8  
9 417 (—) and specificity (—) of the score are plotted with Youden's index (sensitivity + specificity  
10  
11 -1) marked in orange. All 22 features are used in the depicted image on a model trained on all  
12 418  
13  
14 419 data points.  
15  
16

17 420  
18  
19  
20  
21  
22  
23  
24  
25  
26  
27  
28  
29  
30  
31  
32  
33  
34  
35  
36  
37  
38  
39  
40  
41  
42  
43  
44  
45  
46  
47  
48  
49  
50  
51  
52  
53  
54  
55  
56  
57  
58  
59  
60

For peer review only

## Tables

**Table 1.** Demographics, clinical characteristics and 30-day outcome of study participants according to nasopharyngeal Rt-PCR SARS-CoV-2 results

|                                          | All (n=134)   | SARS-Co-V2 positive (n=31) | SARS-CoV-2 negative (n=103) | P value |
|------------------------------------------|---------------|----------------------------|-----------------------------|---------|
| <b>Demographics</b>                      |               |                            |                             |         |
| Female sex                               | 84 (63)       | 20 (65)                    | 64 (62)                     | 0.810   |
| Age, years; Mean (SD)                    | 35.5 [29, 46] | 34 [26, 42]                | 37 [29, 50]                 | 0.316   |
| <b>Known contact with COVID subject</b>  | 33 (28)       | 10 (34)                    | 23 (25)                     | 0.334   |
| Current smoker                           | 39 (29)       | 7 (23)                     | 32 (31)                     | 0.362   |
| Alcohol misuse                           | 3 (2.2)       | 0 (0)                      | 3 (2.9)                     | 0.337   |
| <b>Reason for testing</b>                |               |                            |                             |         |
| Vulnerable person <sup>a</sup>           | 20 (15)       | 6 (19)                     | 14 (14)                     | 0.430   |
| Healthcare worker                        | 114 (85)      | 25 (81)                    | 89 (86)                     | 0.430   |
| <b>Comorbidities</b>                     |               |                            |                             |         |
| Any                                      | 38 (28)       | 3 (9.7)                    | 35 (34)                     | 0.008   |
| Hypertension                             | 10 (7.5)      | 1 (3.2)                    | 9 (8.7)                     | 0.306   |
| Diabetes                                 | 2 (1.)        | 0 (0)                      | 2 (1.9)                     | 0.434   |
| Obesity                                  | 16 (12)       | 5 (16)                     | 11 (11)                     | 0.423   |
| Asthma                                   | 17 (13)       | 1 (3.2)                    | 16 (16)                     | 0.071   |
| Cardiovascular disease <sup>b</sup>      | 5 (3.7)       | 1 (3.2)                    | 4 (3.9)                     | 0.865   |
| Pulmonary disease <sup>c</sup>           | 3 (2.2)       | 0 (0)                      | 3 (2.9)                     | 0.337   |
| Active cancer                            | 3 (2.2)       | 2 (6.5)                    | 1 (1.0)                     | 0.071   |
| Hepatitis or liver cirrhosis             | 2 (1.4)       | 0 (0)                      | 2 (1.9)                     | 0.434   |
| Chronic renal failure <sup>d</sup>       | 2 (1.4)       | 0 (0)                      | 2 (1.9)                     | 0.434   |
| Chronic inflammatory disease             | 4 (3.0)       | 0 (0)                      | 4 (3.9)                     | 0.265   |
| <b>Symptoms</b>                          |               |                            |                             |         |
| Duration of symptoms, days; Median (IQR) | 3 [2, 5]      | 3 [2, 4]                   | 3 [2, 5]                    | 0.942   |
| Duration of symptoms                     |               |                            |                             | 0.695   |
| 0-2 days                                 | 50 (38)       | 10 (32)                    | 40 (39)                     |         |
| 3-5 days                                 | 57 (43)       | 18 (58)                    | 39 (38)                     |         |

|    |                                                |                   |                 |                   |       |
|----|------------------------------------------------|-------------------|-----------------|-------------------|-------|
| 1  |                                                |                   |                 |                   |       |
| 2  |                                                |                   |                 |                   |       |
| 3  | ≥6 days                                        | 26 (20)           | 3 (9.7)         | 23 (23)           |       |
| 4  | Cough                                          | 118 (88)          | 30 (97)         | 88 (85)           | 0.088 |
| 5  | Expectorations                                 | 27 (20)           | 10 (32)         | 17 (17)           | 0.055 |
| 6  | Dyspnea                                        | 79 (59)           | 13 (42)         | 66 (64)           | 0.028 |
| 7  | History of fever                               | 75 (56)           | 23 (74)         | 52 (50)           | 0.020 |
| 8  | Anosmia                                        | 24 (18)           | 10 (32)         | 14 (14)           | 0.017 |
| 9  | Rhinorrhea                                     | 76 (57)           | 20 (65)         | 56 (54)           | 0.317 |
| 10 | Odynophagia                                    | 55 (41)           | 13 (42)         | 42 (41)           | 0.908 |
| 11 | Myalgia                                        | 91 (68)           | 25 (81)         | 66 (64)           | 0.083 |
| 12 | Diarrhea                                       | 34 (25)           | 5 (16)          | 29 (28)           | 0.177 |
| 13 | Temperature, °C; Median (IQR)                  | 36.9 [36.6, 37.3] | 37 [36.7, 37.5] | 36.9 [36.6, 37.2] | 0.202 |
| 14 | Respiratory rate, breaths/minute; Median (IQR) | 18 [16, 20]       | 18 [14, 20]     | 18 [16, 20]       | 0.236 |
| 15 | Saturation, %; Median (IQR)                    | 97 [97, 98]       | 98 [97, 98]     | 97 [97, 98]       | 0.403 |
| 16 | Heart rate, beats/minute; Median (IQR)         | 86 [77, 95]       | 87 [79, 90]     | 86 [76, 98]       | 0.955 |
| 17 |                                                |                   |                 |                   |       |
| 18 | <b>Follow up at 30 days</b>                    |                   |                 |                   |       |
| 19 |                                                |                   |                 |                   |       |
| 20 | Persistence of any symptoms at day 30          | 28 (23)           | 12 (41)         | 16 (17)           | 0.008 |
| 21 | Fatigue                                        | 14 (10)           | 9 (29)          | 5 (4.9)           | 0.000 |
| 22 | Myalgia                                        | 6 (4.5)           | 3 (9.7)         | 3 (2.9)           | 0.110 |
| 23 | Cough                                          | 10 (7.4)          | 3 (9.7)         | 7 (6.8)           | 0.592 |
| 24 | Expectoration                                  | 2 (1.4)           | 1 (3.2)         | 1 (0.97)          | 0.364 |
| 25 | Dyspnea                                        | 9 (6.7)           | 6 (19)          | 3 (2.9)           | 0.001 |
| 26 | Fever                                          | 2 (1.4)           | 1 (3.2)         | 1 (0.97)          | 0.364 |
| 27 | Anosmia                                        | 8 (6.0)           | 7 (23)          | 1 (0.97)          | 0.000 |
| 28 | Rhinorrhea                                     | 1 (0.8)           | 1 (3.2)         | 0 (0)             | 0.067 |
| 29 | Odynodysphagia                                 | 2 (1.4)           | 1 (3.2)         | 1 (0.97)          | 0.364 |
| 30 | Diarrhea                                       | 2 (1.4)           | 1 (3.2)         | 1 (0.97)          | 0.364 |
| 31 |                                                |                   |                 |                   |       |
| 32 | Medical consultation during follow-up          | 32 (26)           | 9 (31)          | 23 (25)           | 0.521 |
| 33 | Hospitalization / Death                        | 0 (0)             | 0 (0)           | 0 (0)             |       |

Data are presented as n (%) unless indicated.

Missing values: contact with infected people, 15; medical consultation at inclusion, 1; vital signs, 5; duration of symptoms, 1; obesity, 1.

Abbreviations: IQR, interquartile range.

<sup>a</sup> ≥ 65 years old or comorbidity (obesity, diabetes, active cancer, chronic cardiovascular, pulmonary, liver, renal or inflammatory disease)

<sup>b</sup> Arrhythmia, coronary disease.

<sup>c</sup> Chronic obstructive pulmonary disease, fibrosis.

<sup>d</sup> Stage III–V according to CKD classification.

421 **Table 2.** Lung ultrasound characteristics of study participants according to nasopharyngeal Rt-PCR SARS-CoV-2 results

|                                                    | All (n=134) | SARS-CoV-2 positive (n=31) | SARS-CoV-2 negative (n=103) | P value |
|----------------------------------------------------|-------------|----------------------------|-----------------------------|---------|
| Abnormal lung ultrasound (any abnormal finding)    | 41 (31)     | 14 (45)                    | 27 (26)                     | 0.045   |
| Abnormal lung ultrasound, apart from focal B-lines | 30 (22)     | 11 (35)                    | 19 (18)                     | 0.046   |
| Multifocal                                         | 16 (12)     | 6 (19)                     | 10 (9.7)                    | 0.146   |
| Bilateral                                          | 8 (6.0)     | 3 (9.7)                    | 5 (4.9)                     | 0.320   |
| Number of pathologic zones; Median (IQR)           | 0 [0, 1]    | 0 [0, 1]                   | 0 [0, 1]                    | 0.044   |
| Pathologic B-lines ( $\geq 3$ )                    | 20 (15)     | 6 (19)                     | 14 (14)                     | 0.430   |
| Confluent B-lines (White lung)                     | 11 (8.2)    | 4 (13)                     | 7 (6.8)                     | 0.277   |
| Pleural thickening                                 | 18 (13)     | 6 (19)                     | 12 (12)                     | 0.270   |
| Consolidations ( $> 1$ cm)                         | 1 (0.75)    | 0 (0)                      | 1 (0.97)                    | 0.582   |
| Pleural effusion                                   | 1 (.75)     | 0 (0)                      | 1 (.97)                     | 0.000   |
| LUS score; Median (IQR)                            | 0 [0, 1]    | 0 [0, 3]                   | 0 [0, 1]                    | 0.044   |

422

423



424 **Table 3.** Demographics and clinical characteristics of study participants according to the presence of an abnormal lung ultrasound

|                                          | All (n=134)   | Abnormal LUS (n=41) | Normal LUS (n=93) | P value |
|------------------------------------------|---------------|---------------------|-------------------|---------|
| <b>Demographics</b>                      |               |                     |                   |         |
| Female sex                               | 84 (63)       | 28 (68)             | 56 (60)           | 0.373   |
| Age; Median (IQR)                        | 35.5 [29, 46] | 38 [31, 48]         | 35 [28, 45]       | 0.574   |
| Current cigarette smoker                 | 39 (29)       | 12 (29)             | 27 (29)           | 0.978   |
| Alcohol misuse                           | 3 (2.2)       | 0 (0)               | 3 (3.2)           | 0.245   |
| <b>Reason of testing</b>                 |               |                     |                   |         |
| Vulnerable person                        | 20 (15)       | 3 (7.3)             | 17 (18)           | 0.101   |
| Healthcare worker                        | 114 (85)      | 38 (93)             | 76 (82)           | 0.101   |
| <b>Positive Rt-PCR result</b>            | 31 (23)       | 14 (34)             | 17 (18)           | 0.045   |
| <b>Comorbidities</b>                     |               |                     |                   |         |
| Any                                      | 38 (28)       | 13 (32)             | 25 (27)           | 0.568   |
| Hypertension                             | 10 (7.5)      | 3 (7.3)             | 7 (7.5)           | 0.966   |
| Diabetes                                 | 2 (1.5)       | 1 (2.4)             | 1 (1.1)           | 0.549   |
| Obesity                                  | 16 (12)       | 3 (7.3)             | 13 (14)           | 0.265   |
| Asthma                                   | 17 (13)       | 7 (17)              | 10 (11)           | 0.311   |
| Cardiovascular disease <sup>b</sup>      | 5 (3.7)       | 2 (4.9)             | 3 (3.2)           | 0.642   |
| Pulmonary disease <sup>c</sup>           | 3 (2.2)       | 0 (0)               | 3 (3.2)           | 0.245   |
| Active cancer                            | 3 (2.2)       | 1 (2.4)             | 2 (2.2)           | 0.917   |
| Hepatitis or liver cirrhosis             | 2 (1.5)       | 1 (2.4)             | 1 (1.1)           | 0.549   |
| Chronic renal failure <sup>d</sup>       | 2 (1.5)       | 0 (0)               | 2 (2.2)           | 0.344   |
| Chronic inflammatory disease             | 4 (3.0)       | 0 (0)               | 4 (4.3)           | 0.178   |
| <b>Symptoms</b>                          |               |                     |                   |         |
| Duration of symptoms, days; Median (IQR) | 3 [2, 5]      | 3 [2, 5]            | 3 [2, 5]          | 0.344   |
| Duration of symptoms                     |               |                     |                   | 0.210   |
| 0-2 days                                 | 50 (38)       | 11 (22)             | 39 (78)           |         |
| 3-5 days                                 | 57 (43)       | 21 (37)             | 36 (63)           |         |
| ≥ 6 days                                 | 26 (20)       | 9 (35)              | 17 (65)           |         |
| Cough                                    | 118 (88)      | 34 (83)             | 84 (90)           | 0.224   |

|    |                                                |                   |                 |                   |       |
|----|------------------------------------------------|-------------------|-----------------|-------------------|-------|
| 3  | Expectorations                                 | 27 (20)           | 7 (17)          | 20 (22)           | 0.556 |
| 4  | Dyspnea                                        | 79 (59)           | 25 (61)         | 54 (58)           | 0.752 |
| 5  | Hemoptysis                                     | 2 (1.5)           | 0 (0)           | 2 (2.2)           | 0.344 |
| 6  | History of fever                               | 75 (56)           | 29 (71)         | 46 (49)           | 0.022 |
| 7  | Anosmia                                        | 24 (18)           | 11 (27)         | 13 (14)           | 0.074 |
| 8  | Rhinorrhea                                     | 76 (57)           | 21 (51)         | 55 (59)           | 0.394 |
| 9  | Odynophagia                                    | 55 (41)           | 17 (41)         | 38 (41)           | 0.948 |
| 10 | Myalgia                                        | 91 (68)           | 31 (76)         | 60 (65)           | 0.205 |
| 11 | Diarrhea                                       | 34 (25)           | 8 (20)          | 26 (28)           | 0.301 |
| 12 | Temperature, °C; Median (IQR)                  | 36.9 [36.6, 37.3] | 37 [36.6, 37.5] | 36.9 [36.6, 37.2] | 0.270 |
| 13 | Respiratory rate, breaths/minute; Median (IQR) | 18 [16, 20]       | 18 [16, 20]     | 18 [16, 20]       | 0.330 |
| 14 | Saturation, %; Median (IQR)                    | 97 [97, 98]       | 97 [97, 98]     | 97 [97, 98]       | 0.385 |
| 15 | Heart rate, beats/minute; Median (IQR)         | 86 [77, 95]       | 88 [79, 98]     | 85 [76.5, 94]     | 0.170 |
| 16 | <b>Follow-up at 30 days</b>                    |                   |                 |                   |       |
| 17 | Persistence of any symptoms at day 30          | 28 (23)           | 9 (24)          | 19 (23)           | 0.924 |
| 18 | Fatigue                                        | 14 (10)           | 7 (17)          | 7 (7.5)           | 0.096 |
| 19 | Myalgia                                        | 6 (4.5)           | 2 (4.9)         | 4 (4.3)           | 0.882 |
| 20 | Cough                                          | 10 (7.5)          | 3 (7.3)         | 7 (7.5)           | 0.966 |
| 21 | Expectorations                                 | 2 (1.5)           | 0 (0)           | 2 (2.2)           | 0.344 |
| 22 | Dyspnea                                        | 9 (6.7)           | 4 (9.8)         | 5 (5.4)           | 0.351 |
| 23 | Fever                                          | 2 (1.5)           | 0 (0)           | 2 (2.2)           | 0.344 |
| 24 | Anosmia                                        | 8 (6.0)           | 1 (2.4)         | 7 (7.5)           | 0.252 |
| 25 | Rhinorrhea                                     | 1 (.75)           | 0 (0)           | 1 (1.1)           | 0.505 |
| 26 | Odynophagia                                    | 2 (1.5)           | 1 (2.4)         | 1 (1.1)           | 0.549 |
| 27 | Diarrhea                                       | 2 (1.5)           | 0 (0)           | 2 (2.2)           | 0.344 |
| 28 | Medical consultation during follow-up          | 26 (21)           | 10 (26)         | 16 (19)           | 0.364 |
| 29 | Hospitalization/Death                          | 0 (0)             | 0 (0)           | 0 (0)             |       |

425 Data are presented as n (%) unless otherwise indicated.

426 Abbreviations: IQR, interquartile range.

427 <sup>a</sup> ≥ 65 years old or comorbidity (obesity, diabetes, active cancer, chronic cardiovascular, pulmonary, liver, renal or inflammatory disease)

428 <sup>b</sup> Arrhythmia, coronary disease.

429 <sup>c</sup> Chronic obstructive pulmonary disease, fibrosis.

430 <sup>d</sup> Stage III–V according to CKD classification

431 **Table 4.** Multivariate logistic regression for COVID diagnosis

| RFE selection order | Feature groups                       |                |                   |                               | Coefficient* |      | Diagnostic performance with various feature sets:                |                                                                  |                                                                   |                                                                   |
|---------------------|--------------------------------------|----------------|-------------------|-------------------------------|--------------|------|------------------------------------------------------------------|------------------------------------------------------------------|-------------------------------------------------------------------|-------------------------------------------------------------------|
|                     | LUS findings (n=10)                  | Symptoms (n=8) | Vital signs (n=3) | Epidemiological history (n=1) | Neg          | Pos  | 22-0 features=22<br>10 LUS<br>8 symptoms<br>1 contact<br>3 signs | 22-7 features=15<br>6 LUS<br>8 symptoms<br>1 contact<br>NO signs | 22-12 features=10<br>5 LUS<br>4 symptoms<br>1 contact<br>NO signs | 22-14 features=8<br>5 LUS<br>3 symptoms<br>NO contact<br>NO signs |
| 1 (removed last)    |                                      | Cough          |                   |                               |              | 0.40 | Sens: 78.8%                                                      | Sens: 75.8%                                                      | Sens: 84.8%                                                       | Sens: 81.8%                                                       |
| 2                   | Pleural thickening (any)             |                |                   |                               |              | 0.69 | Spec: 84.0%                                                      | Spec: 83.2%                                                      | Spec: 72.3%                                                       | Spec: 62.2%                                                       |
| 3                   | Pleural thickening (number of sites) |                |                   |                               | -0.40        |      | AUC: 84.5%                                                       | AUC: 83.5%                                                       | AUC: 80.2%                                                        | AUC: 76.6%                                                        |
| 4                   |                                      | Fever          |                   |                               |              | 0.44 | LR+: 4.9                                                         | LR+: 4.5                                                         | LR+: 3.1                                                          | LR+: 2.2                                                          |
| 5                   | Confluent B lines (number of sites)  |                |                   |                               |              | 0.41 | LR-: 0.3                                                         | LR-: 0.3                                                         | LR-: 0.2                                                          | LR-: 0.3                                                          |
| 6                   | Normal pattern (number of sites)     |                |                   |                               |              | 0.29 | PPV: 83.1%                                                       | PPV: 81.8%                                                       | PPV: 75.4%                                                        | PPV: 68.4%                                                        |
| 7                   | Pathologic B lines (number of sites) |                |                   |                               |              | 0.49 | NPV: 61.4%                                                       | NPV: 80.6%                                                       | NPV: 73.5%                                                        | NPV: 64.7%                                                        |
| 8                   |                                      | Anosmia        |                   |                               |              | 0.43 |                                                                  |                                                                  |                                                                   |                                                                   |
| 9                   |                                      |                |                   | Contact with COVID-19         |              | 0.47 |                                                                  |                                                                  |                                                                   |                                                                   |
| 10                  |                                      | Dyspnea        |                   |                               | -0.28        |      |                                                                  |                                                                  |                                                                   |                                                                   |
| 11                  |                                      | Myalgia        |                   |                               |              | 0.37 |                                                                  |                                                                  |                                                                   |                                                                   |
| 12                  |                                      | Diarrhea       |                   |                               | -0.49        |      |                                                                  |                                                                  |                                                                   |                                                                   |
| 13                  | Multifocality                        |                |                   |                               | -0.26        |      |                                                                  |                                                                  |                                                                   |                                                                   |
| 14                  |                                      | Rhinorrhea     |                   |                               |              | 0.35 |                                                                  |                                                                  |                                                                   |                                                                   |
| 15                  |                                      | Sputum         |                   |                               |              | 0.41 |                                                                  |                                                                  |                                                                   |                                                                   |
| 16                  |                                      |                | Oxygen saturation |                               |              | 0.20 |                                                                  |                                                                  |                                                                   |                                                                   |
| 17                  | Consolidation (any)                  |                |                   |                               | -0.18        |      |                                                                  |                                                                  |                                                                   |                                                                   |
| 18                  |                                      |                | Temperature (°C)  |                               |              | 0.22 |                                                                  |                                                                  |                                                                   |                                                                   |

  

| LUS findings only | Clinical only |
|-------------------|---------------|
| Sens: 45.5%       | Sens: 72.7%   |
| Spec: 77.3%       | Spec: 79.8%   |
| AUC: 63.9%        | AUC: 80.3%    |

|                              |                          |  |                  |  |       |  |
|------------------------------|--------------------------|--|------------------|--|-------|--|
| 19                           |                          |  | Respiratory rate |  | -0.30 |  |
| 20                           | Consolidation (any)      |  |                  |  | -0.18 |  |
| 21                           | Pathologic B lines (any) |  |                  |  | -0.07 |  |
| 22<br><i>(removed first)</i> | Confluent B lines (any)  |  |                  |  | 0.26  |  |

|            |            |
|------------|------------|
| LR+: 2.0   | LR+: 3.6   |
| LR-: 0.7   | LR-: 0.3   |
| PPV: 66.7% | PPV: 78.3% |
| NPV: 55.6% | NPV: 64.5% |

432

433 Multivariate logistic regression for COVID diagnosis where selection order is indirectly proportional to the feature's predictive importance, in  
 434 recursive feature elimination (RFE), i.e., the feature labeled 22 was removed first, while 1 was retained until the end. Four feature groups  
 435 containing 10 LUS findings, 8 symptoms, 3 vital signs and 1 epidemiological history of contact are color-coded according to their coefficient in  
 436 the multivariate score including all 22 features (orange positive correlation with COVID and blue negative correlation). \*The coefficient in  
 437 multivariate scores is susceptible to multicollinearity.

1  
2  
3  
4  
5  
6  
7  
8  
9  
10  
11  
12  
13  
14  
15  
16  
17  
18  
19  
20  
21  
22  
23  
24  
25  
26  
27  
28  
29  
30  
31  
32  
33  
34  
35  
36  
37  
38  
39  
40  
41  
42  
43  
44  
45  
46  
47  
48  
49  
50  
51  
52  
53  
54  
55  
56  
57  
58  
59  
60

438 **List of Supplemental Digital Content**

439 SupplementaryTables.docx

For peer review only

1  
2  
3  
4  
5  
6  
7  
8  
9  
10  
11  
12  
13  
14  
15  
16  
17  
18  
19  
20  
21  
22  
23  
24  
25  
26  
27  
28  
29  
30  
31  
32  
33  
34  
35  
36  
37  
38  
39  
40  
41  
42  
43  
44  
45  
46  
47  
48  
49  
50  
51  
52  
53  
54  
55  
56  
57  
58  
59  
60

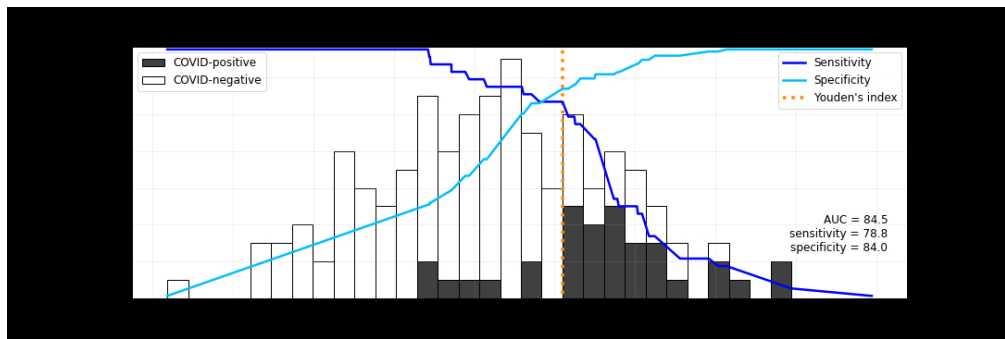

Figure 1. A multivariate logistic regression diagnostic score (x-axis) to discriminate COVIDpos from COVIDneg patients (black and white bars respectively with count on y axis). Sensitivity (—) and specificity (—) of the score are plotted with Youden's index (sensitivity + specificity -1) marked in orange. All 22 features are used in the depicted image on a model trained on all data points.

381x127mm (72 x 72 DPI)

1  
2  
3 **Supplementary Tables.**  
4

5 **Supplementary Table 1.** Characteristics of study participants comparing healthy controls and patients with a lower respiratory tract infection  
6 (COVID<sup>pos</sup> and COVID<sup>neg</sup>).  
7

|                                | <b>All (n=178)</b> | <b>LRTI patients (n=134)</b> | <b>Control patients (n=44)</b> | <b>P value</b> |
|--------------------------------|--------------------|------------------------------|--------------------------------|----------------|
| Female sex                     | 112 (63)           | 84 (63)                      | 28 (64)                        | 0.910          |
| Age, years; Median (IQR)       | 34 [28, 45]        | 35 [29, 46]                  | 31 [25, 42] *                  | 0.007          |
| Pulmonary disease <sup>a</sup> | 3 (1.7)            | 3 (2.2)                      | 0 (0)                          | 0.317          |
| Current cigarettes smoker      | 51 (29)            | 39 (29)                      | 12 (27)                        | 0.816          |

17 \*  $p < 0.05$

18 Data are presented as n (%) unless otherwise indicated.

19 Missing values: 0

20 Abbreviations: IQR, interquartile range; LRTI, Lower respiratory tract infection

21 <sup>a</sup> COPD, fibrosis.  
22  
23  
24  
25  
26  
27  
28  
29  
30  
31  
32  
33  
34  
35  
36  
37  
38  
39  
40  
41  
42  
43  
44  
45  
46

**Supplementary Table 2.** Lung ultrasound characteristics of study participants comparing healthy controls and patients with a lower respiratory tract infection (COVID<sup>pos</sup> and COVID<sup>neg</sup>).

|                                                           | <b>All<br/>(n=178)</b> | <b>LRTI patients<br/>(n=134)</b> | <b>Control patients<br/>(n=44)</b> | <b>P value</b> |
|-----------------------------------------------------------|------------------------|----------------------------------|------------------------------------|----------------|
| Abnormal lung ultrasound                                  | 45 (25)                | 41 (31)                          | 4 (9.1) *                          | 0.004          |
| Abnormal lung ultrasound apart from focal B lines         | 31 (17)                | 30 (22)                          | 1 (2.2)                            | 0.002          |
| Multifocal                                                | 16 (9.0)               | 16 (12)                          | 0 (0) *                            | 0.016          |
| Bilateral                                                 | 8 (4.5)                | 8 (6.0)                          | 0 (0)                              | 0.097          |
| Number of pathologic zones; Median (IQR)                  | 0 [0, 0.7]             | 0 [0, 1]                         | 0 [0, 0] *                         | 0.003          |
| Pathologic B lines ( $\geq 3$ )                           | 23 (13)                | 20 (15)                          | 3 (6.8)                            | 0.164          |
| Confluent B lines (White lung)                            | 12 (6.7)               | 11 (8.2)                         | 1 (2.3)                            | 0.173          |
| Thickening of the pleura with pleural line irregularities | 18 (10)                | 18 (13)                          | 0 (0) *                            | 0.010          |
| Consolidations (>1cm)                                     | 1 (0.6)                | 1 (0.8)                          | 0 (0)                              | 0.566          |
| Pleural effusion                                          | 0 (0)                  | 0 (0)                            | 0 (0)                              |                |
| LUS score; Median (IQR)                                   | 0 [0, 0.75]            | 0 [0, 1]                         | 0 [0, 0] *                         | 0.003          |

Data are presented as n (%) unless otherwise indicated.  
Abbreviations: IQR, interquartile range.



STROBE Statement—Checklist of items that should be included in reports of *cohort studies*

|                              | Item No | Recommendation                                                                                                                                                                                                                                                                                                         | Page No                 |
|------------------------------|---------|------------------------------------------------------------------------------------------------------------------------------------------------------------------------------------------------------------------------------------------------------------------------------------------------------------------------|-------------------------|
| <b>Title and abstract</b>    | 1       | (a) Indicate the study's design with a commonly used term in the title or the abstract                                                                                                                                                                                                                                 | 1                       |
|                              |         | (b) Provide in the abstract an informative and balanced summary of what was done and what was found                                                                                                                                                                                                                    | 2                       |
| <b>Introduction</b>          |         |                                                                                                                                                                                                                                                                                                                        |                         |
| Background/rationale         | 2       | Explain the scientific background and rationale for the investigation being reported                                                                                                                                                                                                                                   | 4                       |
| Objectives                   | 3       | State specific objectives, including any prespecified hypotheses                                                                                                                                                                                                                                                       | 4                       |
| <b>Methods</b>               |         |                                                                                                                                                                                                                                                                                                                        |                         |
| Study design                 | 4       | Present key elements of study design early in the paper                                                                                                                                                                                                                                                                | 5                       |
| Setting                      | 5       | Describe the setting, locations, and relevant dates, including periods of recruitment, exposure, follow-up, and data collection                                                                                                                                                                                        | 5                       |
| Participants                 | 6       | (a) Give the eligibility criteria, and the sources and methods of selection of participants. Describe methods of follow-up<br>(b) For matched studies, give matching criteria and number of exposed and unexposed                                                                                                      | 5                       |
| Variables                    | 7       | Clearly define all outcomes, exposures, predictors, potential confounders, and effect modifiers. Give diagnostic criteria, if applicable                                                                                                                                                                               | 7                       |
| Data sources/<br>measurement | 8*      | For each variable of interest, give sources of data and details of methods of assessment (measurement). Describe comparability of assessment methods if there is more than one group                                                                                                                                   | 8                       |
| Bias                         | 9       | Describe any efforts to address potential sources of bias                                                                                                                                                                                                                                                              | 5                       |
| Study size                   | 10      | Explain how the study size was arrived at                                                                                                                                                                                                                                                                              | 6                       |
| Quantitative variables       | 11      | Explain how quantitative variables were handled in the analyses. If applicable, describe which groupings were chosen and why                                                                                                                                                                                           | 7                       |
| Statistical methods          | 12      | (a) Describe all statistical methods, including those used to control for confounding<br>(b) Describe any methods used to examine subgroups and interactions<br>(c) Explain how missing data were addressed<br>(d) If applicable, explain how loss to follow-up was addressed<br>(e) Describe any sensitivity analyses | 9<br>7<br>9<br>N/A<br>8 |
| <b>Results</b>               |         |                                                                                                                                                                                                                                                                                                                        |                         |
| Participants                 | 13*     | (a) Report numbers of individuals at each stage of study—eg numbers potentially eligible, examined for eligibility, confirmed eligible, included in the study, completing follow-up, and analysed<br>(b) Give reasons for non-participation at each stage<br>(c) Consider use of a flow diagram                        | 9<br>9<br>N/A           |
| Descriptive data             | 14*     | (a) Give characteristics of study participants (eg demographic, clinical, social) and information on exposures and potential confounders<br>(b) Indicate number of participants with missing data for each variable of interest<br>(c) Summarise follow-up time (eg, average and total amount)                         | 9<br>21<br>11           |
| Outcome data                 | 15*     | Report numbers of outcome events or summary measures over time                                                                                                                                                                                                                                                         | 11                      |

|    |                          |    |                                                                                                                                                                                                              |    |
|----|--------------------------|----|--------------------------------------------------------------------------------------------------------------------------------------------------------------------------------------------------------------|----|
| 1  | Main results             | 16 | (a) Give unadjusted estimates and, if applicable, confounder-adjusted estimates and their precision (eg, 95% confidence interval). Make clear which confounders were adjusted for and why they were included | 9  |
| 2  |                          |    | (b) Report category boundaries when continuous variables were categorized                                                                                                                                    |    |
| 3  |                          |    | (c) If relevant, consider translating estimates of relative risk into absolute risk for a meaningful time period                                                                                             |    |
| 4  |                          |    |                                                                                                                                                                                                              |    |
| 5  |                          |    |                                                                                                                                                                                                              |    |
| 6  |                          |    |                                                                                                                                                                                                              |    |
| 7  |                          |    |                                                                                                                                                                                                              |    |
| 8  |                          |    |                                                                                                                                                                                                              |    |
| 9  | Other analyses           | 17 | Report other analyses done—eg analyses of subgroups and interactions, and sensitivity analyses                                                                                                               | 10 |
| 10 |                          |    |                                                                                                                                                                                                              |    |
| 11 | <b>Discussion</b>        |    |                                                                                                                                                                                                              |    |
| 12 |                          |    |                                                                                                                                                                                                              |    |
| 13 | Key results              | 18 | Summarise key results with reference to study objectives                                                                                                                                                     | 12 |
| 14 | Limitations              | 19 | Discuss limitations of the study, taking into account sources of potential bias or imprecision. Discuss both direction and magnitude of any potential bias                                                   | 14 |
| 15 |                          |    |                                                                                                                                                                                                              |    |
| 16 | Interpretation           | 20 | Give a cautious overall interpretation of results considering objectives, limitations, multiplicity of analyses, results from similar studies, and other relevant evidence                                   | 14 |
| 17 |                          |    |                                                                                                                                                                                                              |    |
| 18 |                          |    |                                                                                                                                                                                                              |    |
| 19 | Generalisability         | 21 | Discuss the generalisability (external validity) of the study results                                                                                                                                        | 14 |
| 20 |                          |    |                                                                                                                                                                                                              |    |
| 21 | <b>Other information</b> |    |                                                                                                                                                                                                              |    |
| 22 | Funding                  | 22 | Give the source of funding and the role of the funders for the present study and, if applicable, for the original study on which the present article is based                                                | 15 |
| 23 |                          |    |                                                                                                                                                                                                              |    |
| 24 |                          |    |                                                                                                                                                                                                              |    |

\*Give information separately for exposed and unexposed groups.

**Note:** An Explanation and Elaboration article discusses each checklist item and gives methodological background and published examples of transparent reporting. The STROBE checklist is best used in conjunction with this article (freely available on the Web sites of PLoS Medicine at <http://www.plosmedicine.org/>, Annals of Internal Medicine at <http://www.annals.org/>, and Epidemiology at <http://www.epidem.com/>). Information on the STROBE Initiative is available at <http://www.strobe-statement.org>.

# BMJ Open

## Point-of-care lung ultrasonography for early identification of mild COVID-19: a prospective cohort of outpatients in a Swiss screening center

|                                 |                                                                                                                                                                                                                                                                                                                                                                                                                                                                                                                                                                                                                                                                                                                                                                                                                                                |
|---------------------------------|------------------------------------------------------------------------------------------------------------------------------------------------------------------------------------------------------------------------------------------------------------------------------------------------------------------------------------------------------------------------------------------------------------------------------------------------------------------------------------------------------------------------------------------------------------------------------------------------------------------------------------------------------------------------------------------------------------------------------------------------------------------------------------------------------------------------------------------------|
| Journal:                        | <i>BMJ Open</i>                                                                                                                                                                                                                                                                                                                                                                                                                                                                                                                                                                                                                                                                                                                                                                                                                                |
| Manuscript ID                   | bmjopen-2021-060181.R1                                                                                                                                                                                                                                                                                                                                                                                                                                                                                                                                                                                                                                                                                                                                                                                                                         |
| Article Type:                   | Original research                                                                                                                                                                                                                                                                                                                                                                                                                                                                                                                                                                                                                                                                                                                                                                                                                              |
| Date Submitted by the Author:   | 29-Mar-2022                                                                                                                                                                                                                                                                                                                                                                                                                                                                                                                                                                                                                                                                                                                                                                                                                                    |
| Complete List of Authors:       | Schaad, Siméon; Lausanne University Hospital<br>Brahier, Thomas; Lausanne University Hospital<br>HARTLEY, Mary-Anne; University of Lausanne, Digital global Health Department; EPFL<br>CORDONNIER, Jean-Baptiste; EPFL<br>BOSSO, Luca; Lausanne University Hospital Emergency Care Service, Emergency Department<br>ESPEJO, Tanguy; Lausanne University Hospital Emergency Care Service, Emergency Department<br>PANTET, Olivier; Lausanne University Hospital Adult Intensive Care Unit<br>Hugli, Olivier; University Hospital of Lausanne, Emergency department<br>Carron, Pierre-Nicolas; Centre Hospitalier Universitaire Vaudois, Emergency<br>MEUWLY, Jean-Yves; Lausanne University Hospital Division of Radio-diagnostics and Interventional Radiology, Department of Radiology<br>Boillat-Blanco, Noémie; Infectious Diseases Service |
| <b>Primary Subject Heading</b>: | Infectious diseases                                                                                                                                                                                                                                                                                                                                                                                                                                                                                                                                                                                                                                                                                                                                                                                                                            |
| Secondary Subject Heading:      | Emergency medicine                                                                                                                                                                                                                                                                                                                                                                                                                                                                                                                                                                                                                                                                                                                                                                                                                             |
| Keywords:                       | COVID-19, ULTRASONOGRAPHY, Diagnostic radiology < RADIOLOGY & IMAGING, INFECTIOUS DISEASES                                                                                                                                                                                                                                                                                                                                                                                                                                                                                                                                                                                                                                                                                                                                                     |
|                                 |                                                                                                                                                                                                                                                                                                                                                                                                                                                                                                                                                                                                                                                                                                                                                                                                                                                |

SCHOLARONE™  
Manuscripts

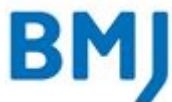

I, the Submitting Author has the right to grant and does grant on behalf of all authors of the Work (as defined in the below author licence), an exclusive licence and/or a non-exclusive licence for contributions from authors who are: i) UK Crown employees; ii) where BMJ has agreed a CC-BY licence shall apply, and/or iii) in accordance with the terms applicable for US Federal Government officers or employees acting as part of their official duties; on a worldwide, perpetual, irrevocable, royalty-free basis to BMJ Publishing Group Ltd ("BMJ") its licensees and where the relevant Journal is co-owned by BMJ to the co-owners of the Journal, to publish the Work in this journal and any other BMJ products and to exploit all rights, as set out in our [licence](#).

The Submitting Author accepts and understands that any supply made under these terms is made by BMJ to the Submitting Author unless you are acting as an employee on behalf of your employer or a postgraduate student of an affiliated institution which is paying any applicable article publishing charge ("APC") for Open Access articles. Where the Submitting Author wishes to make the Work available on an Open Access basis (and intends to pay the relevant APC), the terms of reuse of such Open Access shall be governed by a Creative Commons licence – details of these licences and which [Creative Commons](#) licence will apply to this Work are set out in our licence referred to above.

Other than as permitted in any relevant BMJ Author's Self Archiving Policies, I confirm this Work has not been accepted for publication elsewhere, is not being considered for publication elsewhere and does not duplicate material already published. I confirm all authors consent to publication of this Work and authorise the granting of this licence.

1 **Point-of-care lung ultrasonography for early identification of mild COVID-19: a**  
2 **prospective cohort of outpatients in a Swiss screening center**

3  
4  
5  
6  
7  
8  
9  
10 Siméon SCHAAD<sup>1\*†</sup>, Thomas BRAHIER<sup>1\*</sup>, Mary-Anne HARTLEY<sup>2,3</sup>, Jean-Baptiste  
11 CORDONNIER<sup>3</sup>, Luca BOSSO<sup>5</sup>, Tanguy ESPEJO<sup>5</sup>, Olivier PANTET<sup>4</sup>, Olivier HUGLI<sup>5</sup>,  
12 Pierre-Nicolas CARRON<sup>5</sup>, Jean-Yves MEUWLY<sup>6\*</sup>, Noémie BOILLAT-BLANCO<sup>1\*</sup>  
13  
14  
15  
16

17  
18  
19 \*Equal contribution to this work

20  
21 †Corresponding author

22  
23  
24 **Key words:** COVID-19, lung ultrasound, screening, outpatients

25  
26 <sup>1</sup> Infectious Diseases Service, University Hospital of Lausanne, Switzerland; <sup>2</sup> Digital global  
27 Health Department, Center for primary care and public health, University of Lausanne,  
28 Switzerland; <sup>3</sup> Machine Learning and Optimization Laboratory, EPFL, Switzerland; <sup>4</sup> Intensive  
29 Care Unit, University Hospital of Lausanne, Switzerland; <sup>5</sup> Emergency Department, University  
30 Hospital of Lausanne, Switzerland; <sup>6</sup> Department of Radiology, University Hospital of  
31 Lausanne, Switzerland.  
32  
33  
34  
35  
36  
37  
38  
39  
40  
41

42 **Contact information:** Siméon Schaad, Service of Infectious Diseases, University Hospital of  
43 Lausanne (CHUV), Rue du Bugnon 46, 1011 Lausanne, Switzerland, Phone: +41 79 524 15  
44 85, E-mail: [simeon.schaad@unil.ch](mailto:simeon.schaad@unil.ch)  
45  
46  
47  
48

49 **Word count :** 3486

50  
51 **Funding and support:** this work was supported by the Leenards foundation and by Lausanne  
52 University Hospital  
53  
54  
55  
56  
57  
58  
59  
60



1  
2  
3 51 **Conclusions**  
4

5 52 COVID<sup>pos</sup> patients are significantly more likely to have lung pathology by LUS. However, LUS  
6  
7 53 has a insufficient sensitivity and is not an appropriate screening tool in outpatients. LUS only  
8  
9 54 adds little value to clinical features alone.  
10  
11

12 55

13  
14 56 **Strengths and limitations of this study**  
15

- 16  
17 57 • Acquisition and interpretation of LUS images and videos were standardized using  
18  
19 58 predefined patterns.  
20  
21 59 • Ultrasound experts interpreted all LUS image and videos.  
22  
23  
24 60 • The study population consisted mainly of young and healthy healthcare workers, which  
25  
26 61 prevents extrapolation of our results to an older and comorbid population.  
27  
28

29 62  
30  
31  
32  
33  
34  
35  
36  
37  
38  
39  
40  
41  
42  
43  
44  
45  
46  
47  
48  
49  
50  
51  
52  
53  
54  
55  
56  
57  
58  
59  
60

## 63 **Introduction**

64 A year into the pandemic, Coronavirus Disease (COVID-19) remains a constant threat,  
65 overburdening the healthcare system. Current molecular diagnostic tests such as PCR and rapid  
66 antigen/antibody tests rely on consumables, which are vulnerable to shortages and saturation  
67 during exponential demand. The use of lung imaging as a diagnostic tool for COVID-19 has  
68 shown promises. Chest CT has a good sensitivity for patients triaged in emergency departments  
69 [1,2] and has even been able to detect pathology in asymptomatic cases, suggesting its potential  
70 as an early screening test in specific populations [3–5]. However, CT and even X-rays expose  
71 patients to ionizing radiation, are costly, and often not available in decentralized screening sites.  
72 Lung ultrasonography (LUS) is an alternative, consumable-free, easy-to-use, portable, non-  
73 radiating and non-invasive screening tool that can be performed at the bedside, with simple  
74 disinfection between patients and only a negligible cost of ultrasound gel as a consumable. It  
75 would allow immediate identification of infected patients at the point-of-care and be invaluable  
76 to the sustainable control of the pandemic. Its diagnostic performance for pneumonia has been  
77 established using chest CT as a gold standard [6]. For COVID-19, recent studies conducted in  
78 emergency departments showed several LUS patterns ranging from mild interstitial infiltrate,  
79 to lung consolidation, which correlated with disease progression and outcome [7,8]. However,  
80 these studies included mostly severe patients in emergency departments or intensive care units,  
81 which may lead to overoptimistic diagnostic performance of LUS due to a spectrum effect [9].  
82 To our knowledge, only one study included mild patients who did not need medical assessment,  
83 but the limited number of COVID positive patients prevents us from drawing a conclusion [10].  
84 This study aims to compare LUS characteristics between SARS-CoV-2 PCR-confirmed  
85 (COVID<sup>pos</sup>) and PCR-negative (COVID<sup>neg</sup>) patients in a screening center and explore LUS  
86 performance for identification of COVID-19 outpatients.



## 87 **Methods**

### 88 ***Study design, setting and population***

89 This prospective cohort study recruited consecutive outpatients at the COVID-19 screening  
90 center in Lausanne University Hospital, Switzerland (CHUV) between March 31<sup>st</sup> and May 8<sup>th</sup>  
91 2020. All adults (age  $\geq$  18 years) presenting at the center with cough and/or dyspnea and who  
92 fulfilled eligibility criteria for nasopharyngeal SARS-CoV-2 real time (Rt-) PCR according to  
93 the State recommendations at the time of the study were eligible. These State criteria were the  
94 presence of symptoms suggestive of COVID in a health worker or a subject with at least one  
95 vulnerability criterion, *i.e.* age  $\geq$  65 years old or having at least one comorbidity (obesity,  
96 diabetes, active cancer, chronic cardiovascular, pulmonary, liver, renal or inflammatory  
97 disease). Exclusion criteria were uninterpretable Rt-PCR results or absence of LUS recording.  
98 Written informed consent was obtained from all participants.

99 To ensure that LUS abnormal findings would be specific of a respiratory tract infection, we  
100 included a control group of healthy volunteers, matched for age ( $\pm$  5 years), sex, and smoking  
101 status with COVID<sup>pos</sup> patients (Supplementary Table 1). These volunteers were asymptomatic  
102 during the previous 15 days (absence of odynophagia, cough, dyspnea, runny nose, fever, loss  
103 of smell or taste) and did not have a documented SARS-CoV-2 infection.

104 At inclusion, demographics, comorbidities, symptoms (including duration), and vital signs were  
105 collected using a standardized electronic case report form in REDCap® (Research Electronic  
106 Data Capture). Patients were subsequently classified as either COVID<sup>pos</sup> or COVID<sup>neg</sup>  
107 according to the SARS-CoV-2 RT-PCR results (at inclusion or at any time during the 30-day  
108 follow-up if the test was repeated for the same clinical episode). We assessed 30-day outcome  
109 by phone using a standardized interview (persistence of symptoms, secondary medical  
110 consultation, hospital admission, death). The healthy controls were classified in a third group  
111 (healthy control group).

1  
2  
3 112 ***Research ethics approval***  
4

5 113 The study was approved by the Swiss Ethics Committee of the canton of Vaud (CER-VD 2019-  
6  
7 114 02283).  
8  
9

10 115 ***Patient and public involvement***  
11

12 116 Subjects were not involved in the design or conduct of this study.  
13

14 117 ***Sample size***  
15

16 118 The minimum sample size required for this study was 100 patients with a clinical suspicion of  
17  
18 119 COVID. It was calculated using a COVID prevalence of 20% and an estimated sensitivity of  
19  
20 120 LUS to identify COVID<sup>POS</sup> at 80%. This sample size guarantees a power of 80% with a false  
21  
22 121 discovery rate of 5% [11].  
23  
24  
25

26 122 ***Lung ultrasonography***  
27

28 123 Three medical students performed image acquisitions in the triage site. They were trained in  
29  
30 124 LUS images acquisition with a 1-hour e-learning course and a 1-hour face-to-face practical  
31  
32 125 course with an expert radiologist (JYM). The first 10 acquisitions were done under direct  
33  
34 126 supervision of an experienced board-certified expert (OP) who verified the quality of recorded  
35  
36 127 images. Acquisition was standardized according to the “10-zone method” [12–14], consisting  
37  
38 128 of five zones per hemithorax. Two images (sagittal and transverse) and 5 second videos were  
39  
40 129 systematically recorded in every zone with a Butterfly IQ<sup>TM</sup> personal US system (Butterfly,  
41  
42 130 Guiford, CT, USA), using the lung preset. The LUS probe and the electronic tablet were  
43  
44 131 disinfected with an alcohol-based solution between each patient to avoid nosocomial spread  
45  
46 132 [15].  
47  
48  
49  
50

51 133 For interpretation of LUS pathology, a physician experienced in LUS (TB) and an expert  
52  
53 134 radiologist (JYM), blinded to patients’ diagnoses, independently filled a standardized report  
54  
55 135 form as previously described [8]. The following patterns were reported for every zone: (1)  
56  
57 136 normal appearance (A lines, < 3 B lines), (2) pathologic B lines ( $\geq 3$  B lines), (3) confluent B  
58  
59  
60

137 lines, (4) thickening of the pleura with pleural line irregularities (subpleural consolidation < 1  
138 cm) or (5) consolidation ( $\geq 1$  cm). The presence of pleural effusion was also recorded.

139 Discordance between the two readers were adjudicated by a third expert (OP). The abnormal  
140 images were summed up in a LUS score for each patient, as previously described [8,16,17].

### 141 *Statistical analyses*

142 Differences between COVID<sup>pos</sup> and COVID<sup>neg</sup> patients for all collected demographic and  
143 clinical features as well as LUS findings and LUS score were evaluated by Mann Whitney or  
144 chi-squared test, as appropriate. A bilateral p value <0.05 was considered as indicative of  
145 statistical significance. A multivariate logistic regression was built from 22, 15, 10 and 8  
146 features using recursive feature elimination (RFE), originally including the following:

#### 147 **1) LUS findings (n=10)**

- 148 • Number of zones with each of the five patterns (normal, pathological B lines, confluent  
149 B lines, pleural thickening, consolidation) (n=5)
- 150 • A dichotomized variable for the presence/absence of the above four pathological  
151 patterns detected (n=4)
- 152 • Binary variables for the presence of multifocal disease (n=1)

#### 153 **2) Symptoms at presentation (n=8)**

- 154 • Binary variables for the presence of cough, sputum, dyspnea, fever, anosmia,  
155 rhinorrhea, myalgia, and diarrhea

#### 156 **3) Vital signs (n=3)**

- 157 • Continuous variables for temperature, oxygen saturation, and respiratory rate

#### 158 **4) Epidemiological history (n=1)**

- 159 • Binary variable for a history of known unprotected contact with a COVID-19 case

1  
2  
3 160 Feature coefficients are presented, as well as their importance in ranked order from RFE.  
4  
5 161 Performance at several stages of the RFE are reported, using the top 22, 15, 10 and 8 features.  
6  
7 162 Models using just LUS or just clinical findings were also built.  
8  
9  
10 163 Diagnostic performance is reported as sensitivity, specificity, positive and negative predictive  
11  
12 164 values (PPV, NPV), positive and negative likelihood ratios (LR+, LR-) and area under the  
13  
14 165 receiver-operator curve (AUC). Due to the dataset size, we report findings on the entire dataset.  
15  
16  
17 166 A diagnostic score was derived from the summed coefficients, normalized within a range from  
18  
19 167 -6 (COVID<sup>pos</sup> highly unlikely) to +4 (COVID<sup>pos</sup> highly likely) and the number of patients in  
20  
21 168 each class are presented for each value of the score. The optimal cut-point was chosen using  
22  
23 169 Youden index [18].  
24  
25  
26 170 The kappa coefficient was calculated to measure the inter-rater agreement between the two LUS  
27  
28 171 readers. R Core Team (2019) statistical software and python 3.0 with the sklearn library was  
29  
30 172 used for analyses. Similar analyses were attempted on the outcome at 30-day follow up but  
31  
32 173 impossible due to the limited sample size.  
33  
34  
35 174 The reporting of our results followed the STARD guidelines.  
36  
37  
38  
39  
40  
41  
42  
43  
44  
45  
46  
47  
48  
49  
50  
51  
52  
53  
54  
55  
56  
57  
58  
59  
60

## 175 **Results**

### 176 *Demographics and clinical presentation*

177 A total of 141 patients met inclusion criteria and were enrolled into the study; seven (5%) were  
178 later excluded, due to uninterpretable PCR results or LUS technical issues (hospital's network  
179 connection problems). Of the 134 remaining patients, 31 (23%) were classified as COVID<sup>pos</sup>  
180 and 103 (77%) as COVID<sup>neg</sup> based on Rt-PCR test. Among the 13 COVID<sup>neg</sup> patients who had  
181 a second screening test during the 30-day follow-up, only one had a positive SARS-CoV-2 Rt-  
182 PCR, related to a clearly distinct clinical episode. This patient was thus classified as COVID<sup>neg</sup>.  
183 Most patients were female (63%), healthcare workers (85%) with a median age of 35 years;  
184 most sought out testing within the first 5 days of symptom onset (Table 1). COVID<sup>pos</sup> patients  
185 had fewer comorbidities than COVID<sup>neg</sup>, the latter suffering mostly from asthma, obesity or  
186 hypertension. COVID<sup>pos</sup> patients presented more often with a history of fever and anosmia, but  
187 less often with dyspnea than COVID<sup>neg</sup> patients. Vital signs at inclusion were normal in most  
188 patients of both groups.

### 189 *Lung ultrasonography findings*

190 Lung ultrasound was abnormal in 31% of patients (Table 2). The two observers showed good  
191 concordance to differentiate a normal from an abnormal LUS, with a kappa of 0.67. Most  
192 anomalies were focal and unilateral. The most frequent patterns were pathologic B-lines and  
193 thickening of the pleura with pleural line irregularities. Only 9.1% of control subjects presented  
194 any abnormal finding on LUS, and all these anomalies were focal pathologic or confluent B  
195 lines (Supplementary Tables 2 and 3).

196 Among all symptomatic patients, two factors were significantly associated with abnormal LUS:  
197 SARS-CoV-2 infection and history of fever (Table 3). Indeed, COVID<sup>pos</sup> patients had abnormal  
198 LUS findings significantly more frequently compared with COVID<sup>neg</sup> (45% versus 26%,  
199  $p=0.045$ ). However, this feature alone was poorly sensitive (45%) and specific (74%). No

200 specific ultrasonographic pattern on its own significantly distinguished COVID<sup>pos</sup> from  
201 COVID<sup>neg</sup> subjects (Table 2).

202 Although not statistically different, the proportion of COVID-19<sup>pos</sup> with abnormal LUS  
203 findings was positively associated with symptoms duration. While only 30% of COVID-19<sup>pos</sup>  
204 patients had abnormal LUS within 2 days of symptom onset, 52% of patients had pathological  
205 LUS after 2 days (p=0.24).

### 206 ***Multivariate diagnostic score.***

207 We combined LUS findings with symptoms, vital signs and a binary feature for known contact  
208 with a COVID-19 case to build a multivariate logistic regression diagnostic score. Using all  
209 features, the score had 78.8% sensitivity, 84.0% specificity, 83.1% PPV, 61.4% NPV, 4.9 LR+,  
210 0.3 LR- and 84.5% AUC (Figure 1). We present a plot on which to assess the score according  
211 to a desired sensitivity/specificity trade-off.

212 In Table 4, score performance with several combinations of features at various stages of RFE  
213 are presented. The strongest positive predictor was any evidence of pleural thickening at any  
214 number of sites (coefficient: +0.69) with LUS, although it became a negative predictor with an  
215 increasing number of sites with this feature (-0.40). The presence of pathological B lines and  
216 confluent pathological B lines were also positively associated with COVID infection in this  
217 score. All three of the above patterns were retained by RFE within the top seven features. The  
218 LUS features that were negative and quickly eliminated by RFE were those describing  
219 consolidation and multifocal pathology. Cough, fever and anosmia were the highest ranked  
220 symptoms (coefficient  $\geq 0.4$ ), in line with previous reports. While LUS patterns were highly  
221 ranked in the RFE, rerunning the model without LUS findings reduced AUC by only 4% (AUC:  
222 84.5% vs 80.3%). LUS findings were poorly sensitive in the absence of clinical features (AUC:  
223 63.9% Sensitivity: 45.5%, Specificity: 77.3%, PPV: 66.7%, NPV: 55.6%, LR+: 2.0, LR-: 0.7).

1  
2  
3 224 Combining all 22 features and using RFE, we observe that removing 7 features had minimal  
4  
5 225 impact on score performance, and removing 12 features reduces AUC by only 4% compared to  
6  
7  
8 226 the original.

9  
10 227 ***30-day outcome***

11  
12 228 The 30-day follow-up was available for 121/134 (90%) patients. None was hospitalized or died  
13  
14 229 during follow-up. COVID<sup>pos</sup> patients had more frequently persistent symptoms (fatigue,  
15  
16 230 dyspnea or anosmia) at 30-day compared with COVID<sup>neg</sup> (Table 1).

17  
18  
19 231 The presence of an abnormal LUS at inclusion was not associated with symptom persistence  
20  
21 232 (Table 3).

22  
23  
24 233 As no patients were admitted or died, we could not analyze the value of LUS findings to predict  
25  
26 234 critical clinical outcome.

## 235 Discussion

236 Lung pathology is detectable by chest CT early in the course of COVID disease, even in  
237 asymptomatic patients, suggesting that lung imaging might have a place as a complementary  
238 diagnostic tool [3]. However, large scale CT screening is not feasible even in hospital settings  
239 with abundant resources. Point-of-care LUS is now affordable, portable and implementable in  
240 a decentralized setting and has all the attributes to become a pragmatic community-based  
241 screening tool.

242 We evaluated the diagnostic performance of LUS in a prospective cohort of subjects with mild  
243 acute respiratory tract infection attending a COVID-19 Swiss screening center. COVID<sup>pos</sup>  
244 outpatients more frequently had abnormal LUS findings at inclusion compared with COVID<sup>neg</sup>.  
245 However, LUS findings alone had insufficient sensitivity, NPV and LR- to recommend LUS as  
246 an independent screening tool in outpatients. The combination of both LUS and clinical features  
247 in a multivariate regression score showed that LUS features only adds little value to clinical  
248 features alone regarding the prediction of COVID-19.

249 The limited sensitivity of LUS in our population is discordant with previous studies, which  
250 showed a sensitivity varying from 62 to 97% to identify Rt-PCR-confirmed COVID-19. These  
251 retrospective studies were conducted in emergency departments and included patients with  
252 severe and critical COVID-19 infection [19–21]. Some studies included mild patients who were  
253 evaluated in the ED and sometimes hospitalized[22–24]. Although these patients had mild  
254 COVID-19, their disease was more severe as they needed a medical assessment unlike the  
255 patients included in the present study who came for SARS-CoV2-screening.

256 Other studies using chest CT also showed an excellent sensitivity (97-98%) to diagnose  
257 COVID-19 [2,25,26]. However, all these studies were conducted in hospitalized patients,  
258 preventing extrapolation to our milder population screened for symptoms only.



1  
2  
3 259 The clinical severity of the disease strongly affects the performance of diagnostic tests, and  
4  
5 260 particularly the sensitivity of LUS. We conclude that while LUS may be an interesting COVID-  
6  
7 261 19 screening tool in emergency departments, it is not reliable when used alone in patients with  
8  
9 262 mild disease. In the only study investigating chest CT features in patients with asymptomatic  
10  
11 263 (73%) or mild (27%) COVID-19, which was conducted in the passengers of the cruise ship  
12  
13 264 *Diamond Princess*, 54% of asymptomatic patients and 79% of patients with mild disease  
14  
15 265 presented opacities on chest CT. These results suggested the potential use of chest CT in clinical  
16  
17 266 decision making [3]. Most opacities were located in the peripheral areas of the lung, where LUS  
18  
19 267 is performant. Patients included in the *Diamond Princess* study were older compared with our  
20  
21 268 study population (mean of  $63 \pm 15$  years vs.  $39 \pm 13$  years), a possible explanation for the lower  
22  
23 269 proportion of patients with lung involvement in our study.

24  
25  
26 270 Another potential explanation of the discrepancy between our study and previous publications  
27  
28 271 is the short duration of symptoms at presentation. Although we did not confirm this association  
29  
30 272 with our data, a previous study described a relationship between the duration of infection and  
31  
32 273 the proportion of abnormal radiological findings[27–29]. In one study, only 44% of patients  
33  
34 274 presenting within 2 days of symptoms had an abnormal CT, while this proportion rose to 91%  
35  
36 275 after 3 to 5 days and 96% after 5 days [29]. This study did not provide any data on COVID-19  
37  
38 276 severity. In another study using chest X-ray in patients admitted to the emergency department,  
39  
40 277 the proportion of an abnormal chest X ray increased with the duration of symptoms (63% in the  
41  
42 278 first 2 days to 84% after 9 days) [30]. In our study, we did not confirm this hypothesis, however,  
43  
44 279 we observed more abnormal LUS findings in COVID<sup>pos</sup> patients who had more than 2 days of  
45  
46 280 symptoms (52% versus 30%), although our results were not statistically significant.

47  
48 281 In our study, most patients with abnormal LUS findings presented with focal pathologic B lines,  
49  
50 282 confluent B lines or pleural thickening, irrespective of the etiology of the acute respiratory tract  
51  
52 283 infection. Inclusion of healthy volunteers confirmed the causality between LUS findings and  
53  
54  
55  
56  
57  
58  
59  
60

1  
2  
3 284 acute respiratory tract infections. Indeed, only 9% of healthy volunteers presented LUS  
4  
5 285 anomalies (and all were focal pathologic B lines).  
6

7  
8 286 Two previous study showed that thickened pleural lines on LUS were significantly associated  
9  
10 287 with COVID-19 [19,20]. However, in a third report, LUS findings were similar in both COVID-  
11  
12 288 19 and non-COVID-19 patients [21].  
13

### 14 289 **Limitations**

15  
16  
17 290 Our study has some limitations. First, most of our subjects were healthy and young healthcare  
18  
19 291 workers, which prevents extrapolation of our results to an older and comorbid population.  
20  
21 292 However, young, healthy subjects are of a prime importance in the management of the virus  
22  
23 293 spread [31]. Second, SARS-CoV-2 Rt-PCR nasopharyngeal swab was used as the gold  
24  
25 294 standard, and we might have missed some early infections when it has limited sensitivity [32].  
26  
27 295 However, it is considered as the reference diagnostic method. Furthermore, we sought to  
28  
29 296 mitigate technical and sample collection error using validated nucleic acid amplification tests  
30  
31 297 and a dedicated trained medical team performing nasopharyngeal swabs [33]. In addition, we  
32  
33 298 had 30-day follow-up, which may have reduced the number of patients misclassified as  
34  
35 299 COVID<sup>neg</sup>. Third, medical students, and not ultrasound experts, performed LUS images and  
36  
37 300 videos acquisition. However, they had a focused training by experts and followed a  
38  
39 301 standardized image acquisition protocol. To better investigate the predictive potential of LUS  
40  
41 302 findings, we built a multivariate score. The small sample size and high feature count (n= 22)  
42  
43 303 exposes the model to the risk of overfitting. Thus, this score is not ready for clinical use, but  
44  
45 304 rather is a mean to demonstrate the feature importance by RFE.  
46  
47  
48  
49  
50

51 305

### 52 306 **Conclusion**

53  
54  
55 307 To our knowledge, this is the first study, which assessed the use of LUS in a screening center  
56  
57 308 outpatient population with mild COVID-19. As disease severity plays an important role in the  
58  
59  
60

1  
2  
3 309 ultrasonographic findings, LUS is poorly sensitive as a SARS-CoV-2 screening tool in the  
4  
5 310 context of mild community-level screening.  
6  
7  
8 311  
9  
10  
11  
12  
13  
14  
15  
16  
17  
18  
19  
20  
21  
22  
23  
24  
25  
26  
27  
28  
29  
30  
31  
32  
33  
34  
35  
36  
37  
38  
39  
40  
41  
42  
43  
44  
45  
46  
47  
48  
49  
50  
51  
52  
53  
54  
55  
56  
57  
58  
59  
60

For peer review only

1  
2  
3 312 **Declarations**  
4

5 313 **Funding**  
6

7 314 This work was supported by an academic award of the Leenaards Foundation (to NBB), by the  
8  
9  
10 315 Foundation of Lausanne University Hospital, and the Emergency Department Lausanne  
11  
12 316 University Hospital. The funding bodies had no role in the design of the study and collection,  
13  
14 317 analysis and interpretation of data and in writing the manuscript.  
15  
16

17 318 **Acknowledgements**  
18

19 319 We thank all the patients who accepted to participate and make this study possible. We thank  
20  
21 320 all healthcare workers of the triage unit of the emergency department of the University Hospital  
22  
23 321 of Lausanne, who supported the study and managed COVID-19 suspected patients.  
24  
25

26 322 **Author contributions**  
27

28 323 JYM, OH, PC, NBB: study conception, study design, study performance, study management,  
29  
30 324 data analysis, data interpretation and manuscript writing. SS, TB, JYM, OP: LUS images  
31  
32 325 review, data interpretation and critical review of the manuscript.  
33  
34

35 326 TE, LB: LUS images recording, data interpretation and critical review of the manuscript.  
36

37 327 MH, JC: data analysis, interpretation, visualisations and critical review of the manuscript.  
38

39  
40 328 All authors approved the final version of the manuscript and agreed to be accountable for all  
41  
42 329 aspects of the work in ensuring that questions related to the accuracy or integrity of any part of  
43  
44 330 the work are appropriately investigated and resolved.  
45

46 331 NBB had full access to all the data in the study and takes responsibility for the integrity of the  
47  
48 332 data and the accuracy of the data analysis.  
49  
50

51 333  
52

53 334 [\[dataset\]Dataset available from Schaad et al. \(2021\). Point-of-care lung ultrasonography for](#)  
54  
55 335 [early identification of mild COVID-19: a prospective cohort of outpatients in a Swiss screening](#)  
56  
57 336 [center \[Data set\]. Zenodo. March 18, 2021 https://doi.org/10.5281/zenodo.4617904\[34\]](#)  
58  
59  
60

337

338 **Conflicts of interest:** none declared

339

For peer review only

1  
2  
3  
4  
5  
6  
7  
8  
9  
10  
11  
12  
13  
14  
15  
16  
17  
18  
19  
20  
21  
22  
23  
24  
25  
26  
27  
28  
29  
30  
31  
32  
33  
34  
35  
36  
37  
38  
39  
40  
41  
42  
43  
44  
45  
46  
47  
48  
49  
50  
51  
52  
53  
54  
55  
56  
57  
58  
59  
60

340 **References**

- 341 1 Guan W, Ni Z, Hu Y, Liang W, Ou C, He J, *et al*. Clinical Characteristics of  
342 Coronavirus Disease 2019 in China. *N Engl J Med* 2020;**382**:1708–20.
- 343 2 Ai T, Yang Z, Hou H, Zhan C, Chen C, Lv W, *et al*. Correlation of Chest CT and RT-  
344 PCR Testing in Coronavirus Disease 2019 (COVID-19) in China: A Report of  
345 1014 Cases. *Radiology* 2020;:200642.
- 346 3 Inui S, Fujikawa A, Jitsu M, Kunishima N, Watanabe S, Suzuki Y, *et al*. Chest CT  
347 Findings in Cases from the Cruise Ship “Diamond Princess” with Coronavirus  
348 Disease 2019 (COVID-19). *Radiol Cardiothorac Imaging* 2020;**2**:e200110.
- 349 4 Shi H, Han X, Jiang N, Cao Y, Alwalid O, Gu J, *et al*. Radiological findings from 81  
350 patients with COVID-19 pneumonia in Wuhan, China: a descriptive study. *Lancet Infect Dis*  
351 2020;**20**:425–34.
- 352 5 Islam N, Salameh J-P, Leeftang MM, Hooft L, McGrath TA, van der Pol CB, *et al*.  
353 Thoracic imaging tests for the diagnosis of COVID-19. *Cochrane Database Syst Rev*  
354 2020;**11**:CD013639.
- 355 6 Orso D, Guglielmo N, Copetti R. Lung ultrasound in diagnosing pneumonia in the  
356 emergency department: a systematic review and meta-analysis. *Eur J Emerg Med*  
357 2018;**25**:312–21.
- 358 7 Peng Q-Y, Wang X-T, Zhang L-N. Findings of lung ultrasonography of novel corona  
359 virus pneumonia during the 2019–2020 epidemic. *Intensive Care Med* 2020;:1–2.
- 360 8 Brahier T, Meuwly J-Y, Pantet O, Brochu Vez M-J, Gerhard Donnet H, Hartley M-A,  
361 *et al*. Lung ultrasonography for risk stratification in patients with COVID-19: a prospective  
362 observational cohort study. *Clin Infect Dis Off Publ Infect Dis Soc Am* Published Online First:  
363 17 September 2020. doi:10.1093/cid/ciaa1408
- 364 9 Mulherin SA, Miller WC. Spectrum Bias or Spectrum Effect? Subgroup Variation in  
365 Diagnostic Test Evaluation. *Ann Intern Med* 2002;**137**:598.
- 366 10 Copetti R, Amore G, Giudice CA, Orso D, Cola S, Pillinini P, *et al*. Lung  
367 Ultrasonography in Ruling Out COVID-19 Among Health Care Workers in Two Italian  
368 Emergency Departments: A Multicenter Study. *J Diagn Med Sonogr* 2022;**38**:45–51.
- 369 11 Bujang MA, Adnan TH. Requirements for Minimum Sample Size for Sensitivity and  
370 Specificity Analysis. *J Clin Diagn Res JCDR* 2016;**10**:YE01–6.
- 371 12 Rambhia SH, D’Agostino CA, Noor A, Villani R, Naidich JJ, Pellerito JS. Thoracic  
372 Ultrasound: Technique, Applications, and Interpretation. *Curr Probl Diagn Radiol*  
373 2017;**46**:305–16.
- 374 13 Volpicelli G, Elbarbary M, Blaivas M, Lichtenstein DA, Mathis G, Kirkpatrick AW,  
375 *et al*. International evidence-based recommendations for point-of-care lung ultrasound.  
376 *Intensive Care Med* 2012;**38**:577–91.
- 377 14 Russell FM, Ferre R, Ehrman RR, Noble V, Gargani L, Collins SP, *et al*. What are the  
378 minimum requirements to establish proficiency in lung ultrasound training for quantifying  
379 B-lines? *ESC Heart Fail* 2020;**7**:2941–7.
- 380 15 AIUM. Guidelines for Cleaning and Preparing External- and Internal-Use Ultrasound  
381 Transducers and Equipment Between Patients as well as Safe Handling and Use of  
382 Ultrasound Coupling Gel. 2020.
- 383 16 Mayo PH, Copetti R, Feller-Kopman D, Mathis G, Maury E, Mongodi S, *et al*.  
384 Thoracic ultrasonography: a narrative review. *Intensive Care Med* 2019;**45**:1200–11.
- 385 17 Soldati G, Smargiassi A, Inchingolo R, Buonsenso D, Perrone T, Briganti DF, *et al*.  
386 Proposal for International Standardization of the Use of Lung Ultrasound for Patients With  
387 COVID-19. *J Ultrasound Med*;n/a. doi:10.1002/jum.15285
- 388 18 Schisterman EF, Perkins NJ, Liu A, Bondell H. Optimal cut-point and its

- 1  
2  
3 389 corresponding Youden Index to discriminate individuals using pooled blood samples.  
4 390 *Epidemiol Camb Mass* 2005;**16**:73–81.
- 5 391 19 Pare JR, Camelo I, Mayo KC, Leo MM, Dugas JN, Nelson KP, *et al*. Point-of-care  
6 392 Lung Ultrasound Is More Sensitive than Chest Radiograph for Evaluation of COVID-19.  
7 393 *West J Emerg Med* 2020;**21**:771–8.
- 8 394 20 Bar S, Lecourtois A, Diouf M, Goldberg E, Bourbon C, Arnaud E, *et al*. The  
9 395 association of lung ultrasound images with COVID-19 infection in an emergency room  
10 396 cohort. *Anaesthesia* 2020;**75**:1620–5.
- 11 397 21 Sorlini C, Femia M, Nattino G, Bellone P, Gesu E, Francione P, *et al*. The role of lung  
12 398 ultrasound as a frontline diagnostic tool in the era of COVID-19 outbreak. *Intern Emerg Med*  
13 399 Published Online First: 22 October 2020. doi:10.1007/s11739-020-02524-8
- 14 400 22 Volpicelli G, Gargani L, Perlini S, Spinelli S, Barbieri G, Lanotte A, *et al*. Lung  
15 401 ultrasound for the early diagnosis of COVID-19 pneumonia: an international multicenter  
16 402 study. *Intensive Care Med* 2021;**47**:444–54.
- 17 403 23 Lichter Y, Topilsky Y, Taieb P, Banai A, Hochstadt A, Merdler I, *et al*. Lung  
18 404 ultrasound predicts clinical course and outcomes in COVID-19 patients. *Intensive Care Med*  
19 405 2020;**46**:1873–83.
- 20 406 24 Speidel V, Conen A, Gisler V, Fux CA, Haubitz S. Lung Assessment with Point-of-  
21 407 Care Ultrasound in Respiratory Coronavirus Disease (COVID-19): A Prospective Cohort  
22 408 Study. *Ultrasound Med Biol* 2021;**47**:896–901.
- 23 409 25 Raptis CA, Hammer MM, Short RG, Shah A, Bhalla S, Bierhals AJ, *et al*. Chest CT  
24 410 and Coronavirus Disease (COVID-19): A Critical Review of the Literature to Date. *Am J*  
25 411 *Roentgenol* 2020;**215**:839–42.
- 26 412 26 Fang Y, Zhang H, Xie J, Lin M, Ying L, Pang P, *et al*. Sensitivity of Chest CT for  
27 413 COVID-19: Comparison to RT-PCR. *Radiology* 2020;**296**:E115–7.
- 28 414 27 Salehi S, Abedi A, Balakrishnan S, Gholamrezanezhad A. Coronavirus Disease 2019  
29 415 (COVID-19): A Systematic Review of Imaging Findings in 919 Patients. *Am J Roentgenol*  
30 416 2020;**215**:87–93.
- 31 417 28 Jin Y-H, Cai L, Cheng Z-S, Cheng H, Deng T, Fan Y-P, *et al*. A rapid advice  
32 418 guideline for the diagnosis and treatment of 2019 novel coronavirus (2019-nCoV) infected  
33 419 pneumonia (standard version). *Mil Med Res* 2020;**7**:4.
- 34 420 29 Bernheim A, Mei X, Huang M, Yang Y, Fayad ZA, Zhang N, *et al*. Chest CT Findings  
35 421 in Coronavirus Disease-19 (COVID-19): Relationship to Duration of Infection.  
36 422 *Radiology* 2020;**295**:200463.
- 37 423 30 Vancheri SG, Savietto G, Ballati F, Maggi A, Canino C, Bortolotto C, *et al*.  
38 424 Radiographic findings in 240 patients with COVID-19 pneumonia: time-dependence after the  
39 425 onset of symptoms. *Eur Radiol* 2020;**30**:6161–9.
- 40 426 31 Rivett L, Sridhar S, Sparkes D, Routledge M, Jones NK, Forrest S, *et al*. Screening of  
41 427 healthcare workers for SARS-CoV-2 highlights the role of asymptomatic carriage in COVID-  
42 428 19 transmission. *eLife* 2020;**9**. doi:10.7554/eLife.58728
- 43 429 32 Caruana G, Croxatto A, Coste AT, Opota O, Lamoth F, Jatton K, *et al*. Diagnostic  
44 430 strategies for SARS-CoV-2 infection and interpretation of microbiological results. *Clin*  
45 431 *Microbiol Infect* 2020;**26**:1178–82.
- 46 432 33 Opota O, Brouillet R, Greub G, Jatton K. Comparison of SARS-CoV-2 RT-PCR on a  
47 433 high-throughput molecular diagnostic platform and the cobas SARS-CoV-2 test for the  
48 434 diagnostic of COVID-19 on various clinical samples. *Pathog Dis* 2020;**78**:ftaa061.  
49 435 [dataset]34 Schaad, Siméon, Brahier, Thomas, Hartley, Mary-Anne, Cordonnier, Jean-  
50 436 Baptiste, Bosso, Luca, Espejo, Tanguy, *et al*. Point-of-care lung ultrasonography for early  
51 437 identification of mild COVID-19: a prospective cohort of outpatients in a Swiss screening  
52 438 center. 2021. doi:10.5281/ZENODO.4617904

1  
2  
3  
4  
5  
6  
7  
8  
9  
10  
11  
12  
13  
14  
15  
16  
17  
18  
19  
20  
21  
22  
23  
24  
25  
26  
27  
28  
29  
30  
31  
32  
33  
34  
35  
36  
37  
38  
39  
40  
41  
42  
43  
44  
45  
46  
47  
48  
49  
50  
51  
52  
53  
54  
55  
56  
57  
58  
59  
60

439

440

For peer review only



1  
2  
3 441 **Figure Legend**  
4

5 442 **Figure 1.** A multivariate logistic regression diagnostic score (x-axis) to discriminate COVID<sup>pos</sup>  
6  
7 443 from COVID<sup>neg</sup> patients (black and white bars respectively with count on y axis). Sensitivity  
8  
9 444 (—) and specificity (—) of the score are plotted with Youden's index (sensitivity + specificity  
10  
11 -1) marked in orange. All 22 features are used in the depicted image on a model trained on all  
12  
13 445  
14  
15 446 data points.  
16

17 447  
18  
19  
20  
21  
22  
23  
24  
25  
26  
27  
28  
29  
30  
31  
32  
33  
34  
35  
36  
37  
38  
39  
40  
41  
42  
43  
44  
45  
46  
47  
48  
49  
50  
51  
52  
53  
54  
55  
56  
57  
58  
59  
60

For peer review only

## Tables

**Table 1.** Demographics, clinical characteristics and 30-day outcome of study participants according to nasopharyngeal Rt-PCR SARS-CoV-2 results

|                                          | All (n=134)   | SARS-Co-V2 positive (n=31) | SARS-CoV-2 negative (n=103) | P value |
|------------------------------------------|---------------|----------------------------|-----------------------------|---------|
| <b>Demographics</b>                      |               |                            |                             |         |
| Female sex                               | 84 (63)       | 20 (65)                    | 64 (62)                     | 0.810   |
| Age, years; Mean (SD)                    | 35.5 [29, 46] | 34 [26, 42]                | 37 [29, 50]                 | 0.316   |
| <b>Known contact with COVID subject</b>  |               |                            |                             |         |
| Current smoker                           | 39 (29)       | 7 (23)                     | 32 (31)                     | 0.362   |
| Alcohol misuse                           | 3 (2.2)       | 0 (0)                      | 3 (2.9)                     | 0.337   |
| <b>Reason for testing</b>                |               |                            |                             |         |
| Vulnerable person <sup>a</sup>           | 20 (15)       | 6 (19)                     | 14 (14)                     | 0.430   |
| Healthcare worker                        | 114 (85)      | 25 (81)                    | 89 (86)                     | 0.430   |
| <b>Comorbidities</b>                     |               |                            |                             |         |
| Any                                      | 38 (28)       | 3 (9.7)                    | 35 (34)                     | 0.008   |
| Hypertension                             | 10 (7.5)      | 1 (3.2)                    | 9 (8.7)                     | 0.306   |
| Diabetes                                 | 2 (1.)        | 0 (0)                      | 2 (1.9)                     | 0.434   |
| Obesity                                  | 16 (12)       | 5 (16)                     | 11 (11)                     | 0.423   |
| Asthma                                   | 17 (13)       | 1 (3.2)                    | 16 (16)                     | 0.071   |
| Cardiovascular disease <sup>b</sup>      | 5 (3.7)       | 1 (3.2)                    | 4 (3.9)                     | 0.865   |
| Pulmonary disease <sup>c</sup>           | 3 (2.2)       | 0 (0)                      | 3 (2.9)                     | 0.337   |
| Active cancer                            | 3 (2.2)       | 2 (6.5)                    | 1 (1.0)                     | 0.071   |
| Hepatitis or liver cirrhosis             | 2 (1.4)       | 0 (0)                      | 2 (1.9)                     | 0.434   |
| Chronic renal failure <sup>d</sup>       | 2 (1.4)       | 0 (0)                      | 2 (1.9)                     | 0.434   |
| Chronic inflammatory disease             | 4 (3.0)       | 0 (0)                      | 4 (3.9)                     | 0.265   |
| <b>Symptoms</b>                          |               |                            |                             |         |
| Duration of symptoms, days; Median (IQR) | 3 [2, 5]      | 3 [2, 4]                   | 3 [2, 5]                    | 0.942   |
| Duration of symptoms                     |               |                            |                             | 0.695   |
| 0-2 days                                 | 50 (38)       | 10 (32)                    | 40 (39)                     |         |
| 3-5 days                                 | 57 (43)       | 18 (58)                    | 39 (38)                     |         |

|    |                                                |                   |                 |                   |       |
|----|------------------------------------------------|-------------------|-----------------|-------------------|-------|
| 1  |                                                |                   |                 |                   |       |
| 2  |                                                |                   |                 |                   |       |
| 3  | ≥6 days                                        | 26 (20)           | 3 (9.7)         | 23 (23)           |       |
| 4  | Cough                                          | 118 (88)          | 30 (97)         | 88 (85)           | 0.088 |
| 5  | Expectorations                                 | 27 (20)           | 10 (32)         | 17 (17)           | 0.055 |
| 6  | Dyspnea                                        | 79 (59)           | 13 (42)         | 66 (64)           | 0.028 |
| 7  | History of fever                               | 75 (56)           | 23 (74)         | 52 (50)           | 0.020 |
| 8  | Anosmia                                        | 24 (18)           | 10 (32)         | 14 (14)           | 0.017 |
| 9  | Rhinorrhea                                     | 76 (57)           | 20 (65)         | 56 (54)           | 0.317 |
| 10 | Odynophagia                                    | 55 (41)           | 13 (42)         | 42 (41)           | 0.908 |
| 11 | Myalgia                                        | 91 (68)           | 25 (81)         | 66 (64)           | 0.083 |
| 12 | Diarrhea                                       | 34 (25)           | 5 (16)          | 29 (28)           | 0.177 |
| 13 | Temperature, °C; Median (IQR)                  | 36.9 [36.6, 37.3] | 37 [36.7, 37.5] | 36.9 [36.6, 37.2] | 0.202 |
| 14 | Respiratory rate, breaths/minute; Median (IQR) | 18 [16, 20]       | 18 [14, 20]     | 18 [16, 20]       | 0.236 |
| 15 | Saturation, %; Median (IQR)                    | 97 [97, 98]       | 98 [97, 98]     | 97 [97, 98]       | 0.403 |
| 16 | Heart rate, beats/minute; Median (IQR)         | 86 [77, 95]       | 87 [79, 90]     | 86 [76, 98]       | 0.955 |
| 17 |                                                |                   |                 |                   |       |
| 18 | <b>Follow up at 30 days</b>                    |                   |                 |                   |       |
| 19 |                                                |                   |                 |                   |       |
| 20 | Persistence of any symptoms at day 30          | 28 (23)           | 12 (41)         | 16 (17)           | 0.008 |
| 21 | Fatigue                                        | 14 (10)           | 9 (29)          | 5 (4.9)           | 0.000 |
| 22 | Myalgia                                        | 6 (4.5)           | 3 (9.7)         | 3 (2.9)           | 0.110 |
| 23 | Cough                                          | 10 (7.4)          | 3 (9.7)         | 7 (6.8)           | 0.592 |
| 24 | Expectoration                                  | 2 (1.4)           | 1 (3.2)         | 1 (0.97)          | 0.364 |
| 25 | Dyspnea                                        | 9 (6.7)           | 6 (19)          | 3 (2.9)           | 0.001 |
| 26 | Fever                                          | 2 (1.4)           | 1 (3.2)         | 1 (0.97)          | 0.364 |
| 27 | Anosmia                                        | 8 (6.0)           | 7 (23)          | 1 (0.97)          | 0.000 |
| 28 | Rhinorrhea                                     | 1 (0.8)           | 1 (3.2)         | 0 (0)             | 0.067 |
| 29 | Odynodysphagia                                 | 2 (1.4)           | 1 (3.2)         | 1 (0.97)          | 0.364 |
| 30 | Diarrhea                                       | 2 (1.4)           | 1 (3.2)         | 1 (0.97)          | 0.364 |
| 31 |                                                |                   |                 |                   |       |
| 32 | Medical consultation during follow-up          | 32 (26)           | 9 (31)          | 23 (25)           | 0.521 |
| 33 | Hospitalization / Death                        | 0 (0)             | 0 (0)           | 0 (0)             |       |

Data are presented as n (%) unless indicated.

Missing values: contact with infected people, 15; medical consultation at inclusion, 1; vital signs, 5; duration of symptoms, 1; obesity, 1.

Abbreviations: IQR, interquartile range.

<sup>a</sup> ≥ 65 years old or comorbidity (obesity, diabetes, active cancer, chronic cardiovascular, pulmonary, liver, renal or inflammatory disease)

<sup>b</sup> Arrhythmia, coronary disease.

<sup>c</sup> Chronic obstructive pulmonary disease, fibrosis.

<sup>d</sup> Stage III–V according to CKD classification.

448 **Table 2.** Lung ultrasound characteristics of study participants according to nasopharyngeal Rt-PCR SARS-CoV-2 results

|                                                    | All (n=134) | SARS-CoV-2 positive (n=31) | SARS-CoV-2 negative (n=103) | P value |
|----------------------------------------------------|-------------|----------------------------|-----------------------------|---------|
| Abnormal lung ultrasound (any abnormal finding)    | 41 (31)     | 14 (45)                    | 27 (26)                     | 0.045   |
| Abnormal lung ultrasound, apart from focal B-lines | 30 (22)     | 11 (35)                    | 19 (18)                     | 0.046   |
| Multifocal                                         | 16 (12)     | 6 (19)                     | 10 (9.7)                    | 0.146   |
| Bilateral                                          | 8 (6.0)     | 3 (9.7)                    | 5 (4.9)                     | 0.320   |
| Number of pathologic zones; Median (IQR)           | 0 [0, 1]    | 0 [0, 1]                   | 0 [0, 1]                    | 0.044   |
| Pathologic B-lines ( $\geq 3$ )                    | 20 (15)     | 6 (19)                     | 14 (14)                     | 0.430   |
| Confluent B-lines (White lung)                     | 11 (8.2)    | 4 (13)                     | 7 (6.8)                     | 0.277   |
| Pleural thickening                                 | 18 (13)     | 6 (19)                     | 12 (12)                     | 0.270   |
| Consolidations ( $> 1$ cm)                         | 1 (0.75)    | 0 (0)                      | 1 (0.97)                    | 0.582   |
| Pleural effusion                                   | 1 (.75)     | 0 (0)                      | 1 (.97)                     | 0.000   |
| LUS score; Median (IQR)                            | 0 [0, 1]    | 0 [0, 3]                   | 0 [0, 1]                    | 0.044   |

449

450

451 **Table 3.** Demographics and clinical characteristics of study participants according to the presence of an abnormal lung ultrasound

|                                          | All (n=134)   | Abnormal LUS (n=41) | Normal LUS (n=93) | P value |
|------------------------------------------|---------------|---------------------|-------------------|---------|
| <b>Demographics</b>                      |               |                     |                   |         |
| Female sex                               | 84 (63)       | 28 (68)             | 56 (60)           | 0.373   |
| Age; Median (IQR)                        | 35.5 [29, 46] | 38 [31, 48]         | 35 [28, 45]       | 0.574   |
| Current cigarette smoker                 | 39 (29)       | 12 (29)             | 27 (29)           | 0.978   |
| Alcohol misuse                           | 3 (2.2)       | 0 (0)               | 3 (3.2)           | 0.245   |
| <b>Reason of testing</b>                 |               |                     |                   |         |
| Vulnerable person                        | 20 (15)       | 3 (7.3)             | 17 (18)           | 0.101   |
| Healthcare worker                        | 114 (85)      | 38 (93)             | 76 (82)           | 0.101   |
| <b>Positive Rt-PCR result</b>            | 31 (23)       | 14 (34)             | 17 (18)           | 0.045   |
| <b>Comorbidities</b>                     |               |                     |                   |         |
| Any                                      | 38 (28)       | 13 (32)             | 25 (27)           | 0.568   |
| Hypertension                             | 10 (7.5)      | 3 (7.3)             | 7 (7.5)           | 0.966   |
| Diabetes                                 | 2 (1.5)       | 1 (2.4)             | 1 (1.1)           | 0.549   |
| Obesity                                  | 16 (12)       | 3 (7.3)             | 13 (14)           | 0.265   |
| Asthma                                   | 17 (13)       | 7 (17)              | 10 (11)           | 0.311   |
| Cardiovascular disease <sup>b</sup>      | 5 (3.7)       | 2 (4.9)             | 3 (3.2)           | 0.642   |
| Pulmonary disease <sup>c</sup>           | 3 (2.2)       | 0 (0)               | 3 (3.2)           | 0.245   |
| Active cancer                            | 3 (2.2)       | 1 (2.4)             | 2 (2.2)           | 0.917   |
| Hepatitis or liver cirrhosis             | 2 (1.5)       | 1 (2.4)             | 1 (1.1)           | 0.549   |
| Chronic renal failure <sup>d</sup>       | 2 (1.5)       | 0 (0)               | 2 (2.2)           | 0.344   |
| Chronic inflammatory disease             | 4 (3.0)       | 0 (0)               | 4 (4.3)           | 0.178   |
| <b>Symptoms</b>                          |               |                     |                   |         |
| Duration of symptoms, days; Median (IQR) | 3 [2, 5]      | 3 [2, 5]            | 3 [2, 5]          | 0.344   |
| Duration of symptoms                     |               |                     |                   | 0.210   |
| 0-2 days                                 | 50 (38)       | 11 (22)             | 39 (78)           |         |
| 3-5 days                                 | 57 (43)       | 21 (37)             | 36 (63)           |         |
| ≥ 6 days                                 | 26 (20)       | 9 (35)              | 17 (65)           |         |
| Cough                                    | 118 (88)      | 34 (83)             | 84 (90)           | 0.224   |

|    |                                                |                   |                 |                   |       |
|----|------------------------------------------------|-------------------|-----------------|-------------------|-------|
| 1  |                                                |                   |                 |                   |       |
| 2  |                                                |                   |                 |                   |       |
| 3  | Expectorations                                 | 27 (20)           | 7 (17)          | 20 (22)           | 0.556 |
| 4  | Dyspnea                                        | 79 (59)           | 25 (61)         | 54 (58)           | 0.752 |
| 5  | Hemoptysis                                     | 2 (1.5)           | 0 (0)           | 2 (2.2)           | 0.344 |
| 6  | History of fever                               | 75 (56)           | 29 (71)         | 46 (49)           | 0.022 |
| 7  | Anosmia                                        | 24 (18)           | 11 (27)         | 13 (14)           | 0.074 |
| 8  | Rhinorrhea                                     | 76 (57)           | 21 (51)         | 55 (59)           | 0.394 |
| 9  | Odynophagia                                    | 55 (41)           | 17 (41)         | 38 (41)           | 0.948 |
| 10 | Myalgia                                        | 91 (68)           | 31 (76)         | 60 (65)           | 0.205 |
| 11 | Diarrhea                                       | 34 (25)           | 8 (20)          | 26 (28)           | 0.301 |
| 12 | Temperature, °C; Median (IQR)                  | 36.9 [36.6, 37.3] | 37 [36.6, 37.5] | 36.9 [36.6, 37.2] | 0.270 |
| 13 | Respiratory rate, breaths/minute; Median (IQR) | 18 [16, 20]       | 18 [16, 20]     | 18 [16, 20]       | 0.330 |
| 14 | Saturation, %; Median (IQR)                    | 97 [97, 98]       | 97 [97, 98]     | 97 [97, 98]       | 0.385 |
| 15 | Heart rate, beats/minute; Median (IQR)         | 86 [77, 95]       | 88 [79, 98]     | 85 [76.5, 94]     | 0.170 |
| 16 | <b>Follow-up at 30 days</b>                    |                   |                 |                   |       |
| 17 | Persistence of any symptoms at day 30          | 28 (23)           | 9 (24)          | 19 (23)           | 0.924 |
| 18 | Fatigue                                        | 14 (10)           | 7 (17)          | 7 (7.5)           | 0.096 |
| 19 | Myalgia                                        | 6 (4.5)           | 2 (4.9)         | 4 (4.3)           | 0.882 |
| 20 | Cough                                          | 10 (7.5)          | 3 (7.3)         | 7 (7.5)           | 0.966 |
| 21 | Expectorations                                 | 2 (1.5)           | 0 (0)           | 2 (2.2)           | 0.344 |
| 22 | Dyspnea                                        | 9 (6.7)           | 4 (9.8)         | 5 (5.4)           | 0.351 |
| 23 | Fever                                          | 2 (1.5)           | 0 (0)           | 2 (2.2)           | 0.344 |
| 24 | Anosmia                                        | 8 (6.0)           | 1 (2.4)         | 7 (7.5)           | 0.252 |
| 25 | Rhinorrhea                                     | 1 (.75)           | 0 (0)           | 1 (1.1)           | 0.505 |
| 26 | Odynophagia                                    | 2 (1.5)           | 1 (2.4)         | 1 (1.1)           | 0.549 |
| 27 | Diarrhea                                       | 2 (1.5)           | 0 (0)           | 2 (2.2)           | 0.344 |
| 28 | Medical consultation during follow-up          | 26 (21)           | 10 (26)         | 16 (19)           | 0.364 |
| 29 | Hospitalization/Death                          | 0 (0)             | 0 (0)           | 0 (0)             |       |

452 Data are presented as n (%) unless otherwise indicated.

453 Abbreviations: IQR, interquartile range.

454 <sup>a</sup> ≥ 65 years old or comorbidity (obesity, diabetes, active cancer, chronic cardiovascular, pulmonary, liver, renal or inflammatory disease)

455 <sup>b</sup> Arrhythmia, coronary disease.

456 <sup>c</sup> Chronic obstructive pulmonary disease, fibrosis.

457 <sup>d</sup> Stage III–V according to CKD classification

41

42

43

44

45

46

458 **Table 4.** Multivariate logistic regression for COVID diagnosis

| RFE selection order | Feature groups                       |                |                   |                               | Coefficient* |      | Diagnostic performance with various feature sets:                |                                                                  |                                                                   |                                                                   |
|---------------------|--------------------------------------|----------------|-------------------|-------------------------------|--------------|------|------------------------------------------------------------------|------------------------------------------------------------------|-------------------------------------------------------------------|-------------------------------------------------------------------|
|                     | LUS findings (n=10)                  | Symptoms (n=8) | Vital signs (n=3) | Epidemiological history (n=1) | Neg          | Pos  | 22-0 features=22<br>10 LUS<br>8 symptoms<br>1 contact<br>3 signs | 22-7 features=15<br>6 LUS<br>8 symptoms<br>1 contact<br>NO signs | 22-12 features=10<br>5 LUS<br>4 symptoms<br>1 contact<br>NO signs | 22-14 features=8<br>5 LUS<br>3 symptoms<br>NO contact<br>NO signs |
| 1 (removed last)    |                                      | Cough          |                   |                               |              | 0.40 | Sens: 78.8%                                                      | Sens: 75.8%                                                      | Sens: 84.8%                                                       | Sens: 81.8%                                                       |
| 2                   | Pleural thickening (any)             |                |                   |                               |              | 0.69 | Spec: 84.0%                                                      | Spec:83.2%                                                       | Spec: 72.3%                                                       | Spec: 62.2%                                                       |
| 3                   | Pleural thickening (number of sites) |                |                   |                               | -0.40        |      | AUC: 84.5%                                                       | AUC: 83.5%                                                       | AUC: 80.2%                                                        | AUC: 76.6%                                                        |
| 4                   |                                      | Fever          |                   |                               |              | 0.44 | LR+: 4.9                                                         | LR+: 4.5                                                         | LR+: 3.1                                                          | LR+: 2.2                                                          |
| 5                   | Confluent B lines (number of sites)  |                |                   |                               |              | 0.41 | LR-: 0.3                                                         | LR-: 0.3                                                         | LR-: 0.2                                                          | LR-: 0.3                                                          |
| 6                   | Normal pattern (number of sites)     |                |                   |                               |              | 0.29 | PPV: 83.1%                                                       | PPV: 81.8%                                                       | PPV: 75.4%                                                        | PPV: 68.4%                                                        |
| 7                   | Pathologic B lines (number of sites) |                |                   |                               |              | 0.49 | NPV: 61.4%                                                       | NPV: 80.6%                                                       | NPV: 73.5%                                                        | NPV: 64.7%                                                        |
| 8                   |                                      | Anosmia        |                   |                               |              | 0.43 |                                                                  |                                                                  |                                                                   |                                                                   |
| 9                   |                                      |                |                   | Contact with COVID-19         |              | 0.47 |                                                                  |                                                                  |                                                                   |                                                                   |
| 10                  |                                      | Dyspnea        |                   |                               | -0.28        |      |                                                                  |                                                                  |                                                                   |                                                                   |
| 11                  |                                      | Myalgia        |                   |                               |              | 0.37 |                                                                  |                                                                  |                                                                   |                                                                   |
| 12                  |                                      | Diarrhea       |                   |                               | -0.49        |      |                                                                  |                                                                  |                                                                   |                                                                   |
| 13                  | Multifocality                        |                |                   |                               | -0.26        |      |                                                                  |                                                                  |                                                                   |                                                                   |
| 14                  |                                      | Rhinorrhea     |                   |                               |              | 0.35 |                                                                  |                                                                  |                                                                   |                                                                   |
| 15                  |                                      | Sputum         |                   |                               |              | 0.41 |                                                                  |                                                                  |                                                                   |                                                                   |
| 16                  |                                      |                | Oxygen saturation |                               |              | 0.20 |                                                                  |                                                                  |                                                                   |                                                                   |
| 17                  | Consolidation (any)                  |                |                   |                               | -0.18        |      |                                                                  |                                                                  |                                                                   |                                                                   |
| 18                  |                                      |                | Temperature (°C)  |                               |              | 0.22 |                                                                  |                                                                  |                                                                   |                                                                   |

  

| LUS findings only | Clinical only |
|-------------------|---------------|
| Sens: 45.5%       | Sens: 72.7%   |
| Spec: 77.3%       | Spec: 79.8%   |
| AUC: 63.9%        | AUC: 80.3%    |

|                              |                          |  |                  |  |       |  |
|------------------------------|--------------------------|--|------------------|--|-------|--|
| 19                           |                          |  | Respiratory rate |  | -0.30 |  |
| 20                           | Consolidation (any)      |  |                  |  | -0.18 |  |
| 21                           | Pathologic B lines (any) |  |                  |  | -0.07 |  |
| 22<br><i>(removed first)</i> | Confluent B lines (any)  |  |                  |  | 0.26  |  |

|            |            |
|------------|------------|
| LR+: 2.0   | LR+: 3.6   |
| LR-: 0.7   | LR-: 0.3   |
| PPV: 66.7% | PPV: 78.3% |
| NPV: 55.6% | NPV: 64.5% |

459

460 Multivariate logistic regression for COVID diagnosis where selection order is indirectly proportional to the feature’s predictive importance, in  
 461 recursive feature elimination (RFE), i.e., the feature labeled 22 was removed first, while 1 was retained until the end. Four feature groups  
 462 containing 10 LUS findings, 8 symptoms, 3 vital signs and 1 epidemiological history of contact are color-coded according to their coefficient in  
 463 the multivariate score including all 22 features (orange positive correlation with COVID and blue negative correlation). \*The coefficient in  
 464 multivariate scores is susceptible to multicollinearity.



1  
2  
3 465 **List of Supplemental Digital Content**  
4

5 466 SupplementaryTables.docx  
6  
7  
8  
9  
10  
11  
12  
13  
14  
15  
16  
17  
18  
19  
20  
21  
22  
23  
24  
25  
26  
27  
28  
29  
30  
31  
32  
33  
34  
35  
36  
37  
38  
39  
40  
41  
42  
43  
44  
45  
46  
47  
48  
49  
50  
51  
52  
53  
54  
55  
56  
57  
58  
59  
60

For peer review only

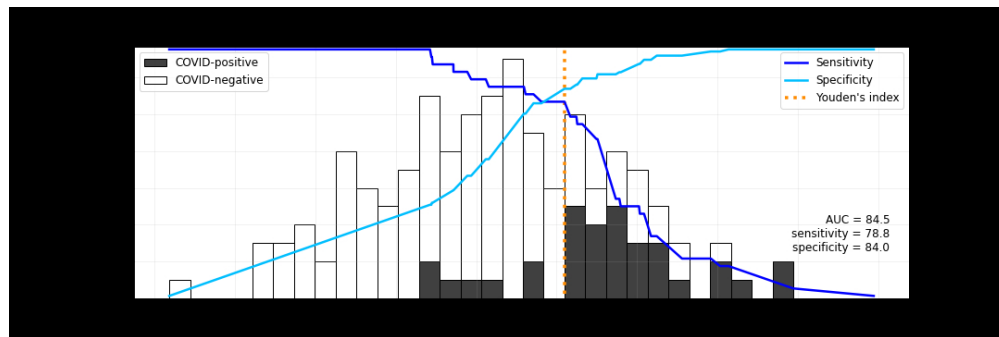

Figure 1. A multivariate logistic regression diagnostic score (x-axis) to discriminate COVIDpos from COVIDneg patients (black and white bars respectively with count on y axis). Sensitivity (—) and specificity (—) of the score are plotted with Youden's index (sensitivity + specificity -1) marked in orange. All 22 features are used in the depicted image on a model trained on all data points.

381x127mm (72 x 72 DPI)

1 **Supplementary Tables.**

2 **Supplementary Table 1.** Characteristics of study participants comparing healthy controls and patients with a lower respiratory tract infection (COVID<sup>pos</sup> and  
3 COVID<sup>neg</sup>).

4

5

6

|                                  | <b>All (n=178)</b> | <b>LRTI patients</b> | <b>Control patients</b> |       |
|----------------------------------|--------------------|----------------------|-------------------------|-------|
| 7 Female sex                     | 112 (63)           | 84 (63)              | 28 (64)                 | 0.910 |
| 8 Age, years; Median (IQR)       | 34 [28, 45]        | 35 [29, 46]          | 31 [25, 42]             | 0.007 |
| 9 Pulmonary disease <sup>a</sup> | 3 (1.7)            | 3 (2.2)              | 0 (0)                   | 0.317 |
| 10 Current cigarettes smoker     | 51 (29)            | 39 (29)              | 12 (27)                 | 0.816 |

11

12

13

14 Data are presented as n (%) unless otherwise indicated.

15 Missing values: 0

16 Abbreviations: IQR, interquartile range; LRTI, Lower respiratory tract infection

17 <sup>a</sup>COPD, fibrosis.

18

19

20

21

22

23

24

25

26

27

28

29

30

31

32

33

34

35

36

37

38

39

40

41

42

43

44

45

46

**Supplementary Table 2.** Lung ultrasound characteristics of study participants comparing healthy controls and patients with a lower respiratory tract infection (COVID<sup>pos</sup> and COVID<sup>neg</sup>).

|                                                           | <b>All<br/>(n=178)</b> | <b>LRTI patients<br/>(n=134)</b> | <b>Control patients<br/>(n=44)</b> |       |
|-----------------------------------------------------------|------------------------|----------------------------------|------------------------------------|-------|
| Abnormal lung ultrasound                                  | 45 (25)                | 41 (31)                          | 4 (9.1)                            | 0.004 |
| Abnormal lung ultrasound apart from focal B lines         | 31 (17)                | 30 (22)                          | 1 (2.2)                            | 0.002 |
| Multifocal                                                | 16 (9.0)               | 16 (12)                          | 0 (0)                              | 0.016 |
| Bilateral                                                 | 8 (4.5)                | 8 (6.0)                          | 0 (0)                              | 0.097 |
| Number of pathologic zones; Median (IQR)                  | 0 [0, 0.7]             | 0 [0, 1]                         | 0 [0, 0]                           | 0.003 |
| Pathologic B lines ( $\geq 3$ )                           | 23 (13)                | 20 (15)                          | 3 (6.8)                            | 0.164 |
| Confluent B lines (White lung)                            | 12 (6.7)               | 11 (8.2)                         | 1 (2.3)                            | 0.173 |
| Thickening of the pleura with pleural line irregularities | 18 (10)                | 18 (13)                          | 0 (0)                              | 0.010 |
| Consolidations (>1cm)                                     | 1 (0.6)                | 1 (0.8)                          | 0 (0)                              | 0.566 |
| Pleural effusion                                          | 0 (0)                  | 0 (0)                            | 0 (0)                              |       |
| LUS score; Median (IQR)                                   | 0 [0, 0.75]            | 0 [0, 1]                         | 0 [0, 0]                           | 0.003 |

Data are presented as n (%) unless otherwise indicated.

Abbreviations: IQR, interquartile range.

**Supplementary Table 3.** Lung ultrasound characteristics of study participants comparing healthy controls and COVID-19 patients

For peer review only - <http://bmjopen.bmj.com/site/about/guidelines.xhtml>

|                                                           | <b>All<br/>(n=75)</b> | <b>COVID-19 patients<br/>(n = 31)</b> | <b>Control patients<br/>(n = 44)</b> |         |
|-----------------------------------------------------------|-----------------------|---------------------------------------|--------------------------------------|---------|
| Abnormal lung ultrasound                                  | 18 (24.0)             | 14 (45)                               | 4 (9.1)                              | 0.001   |
| Abnormal lung ultrasound apart from focal B lines         | 10 (13)               | 9 (29)                                | 1 (2.2)                              | 0.003   |
| Multifocal                                                | 6 (8)                 | 6 (19)                                | 0 (0)                                | 0.009   |
| Bilateral                                                 | 3 (4)                 | 3 (9.7)                               | 0 (0)                                | 0.132   |
| Number of pathologic zones; Median (IQR)                  | 0 [0, 0]              | 0 [0, 1]                              | 0 [0, 0]                             | < 0.001 |
| Pathologic B lines ( $\geq 3$ )                           | 9 (12)                | 6 (19)                                | 3 (6.8)                              | 0.199   |
| Confluent B lines (White lung)                            | 5 (6.7)               | 4 (13)                                | 1 (2.3)                              | 0.178   |
| Thickening of the pleura with pleural line irregularities | 6 (8)                 | 6 (19)                                | 0 (0.0)                              | 0.009   |
| Consolidations (>1cm)                                     | 0 (0)                 | 0 (0)                                 | 0 (0)                                |         |
| Pleural effusion                                          | 0 (0)                 | 0 (0)                                 | 0 (0)                                |         |
| LUS score; Median (IQR)                                   | 0 [0, 0]              | 0 [0, 2.5]                            | 0 [0, 0]                             | <0.001  |

Data are presented as n (%) unless otherwise indicated.

Abbreviations: IQR, interquartile range.

STROBE Statement—Checklist of items that should be included in reports of *cohort studies*

|                              | Item No | Recommendation                                                                                                                                                                                                                                                                                                         | Page No                 |
|------------------------------|---------|------------------------------------------------------------------------------------------------------------------------------------------------------------------------------------------------------------------------------------------------------------------------------------------------------------------------|-------------------------|
| <b>Title and abstract</b>    | 1       | (a) Indicate the study's design with a commonly used term in the title or the abstract                                                                                                                                                                                                                                 | 1                       |
|                              |         | (b) Provide in the abstract an informative and balanced summary of what was done and what was found                                                                                                                                                                                                                    | 2                       |
| <b>Introduction</b>          |         |                                                                                                                                                                                                                                                                                                                        |                         |
| Background/rationale         | 2       | Explain the scientific background and rationale for the investigation being reported                                                                                                                                                                                                                                   | 4                       |
| Objectives                   | 3       | State specific objectives, including any prespecified hypotheses                                                                                                                                                                                                                                                       | 4                       |
| <b>Methods</b>               |         |                                                                                                                                                                                                                                                                                                                        |                         |
| Study design                 | 4       | Present key elements of study design early in the paper                                                                                                                                                                                                                                                                | 5                       |
| Setting                      | 5       | Describe the setting, locations, and relevant dates, including periods of recruitment, exposure, follow-up, and data collection                                                                                                                                                                                        | 5                       |
| Participants                 | 6       | (a) Give the eligibility criteria, and the sources and methods of selection of participants. Describe methods of follow-up<br>(b) For matched studies, give matching criteria and number of exposed and unexposed                                                                                                      | 5                       |
| Variables                    | 7       | Clearly define all outcomes, exposures, predictors, potential confounders, and effect modifiers. Give diagnostic criteria, if applicable                                                                                                                                                                               | 7                       |
| Data sources/<br>measurement | 8*      | For each variable of interest, give sources of data and details of methods of assessment (measurement). Describe comparability of assessment methods if there is more than one group                                                                                                                                   | 8                       |
| Bias                         | 9       | Describe any efforts to address potential sources of bias                                                                                                                                                                                                                                                              | 5                       |
| Study size                   | 10      | Explain how the study size was arrived at                                                                                                                                                                                                                                                                              | 6                       |
| Quantitative variables       | 11      | Explain how quantitative variables were handled in the analyses. If applicable, describe which groupings were chosen and why                                                                                                                                                                                           | 7                       |
| Statistical methods          | 12      | (a) Describe all statistical methods, including those used to control for confounding<br>(b) Describe any methods used to examine subgroups and interactions<br>(c) Explain how missing data were addressed<br>(d) If applicable, explain how loss to follow-up was addressed<br>(e) Describe any sensitivity analyses | 9<br>7<br>9<br>N/A<br>8 |
| <b>Results</b>               |         |                                                                                                                                                                                                                                                                                                                        |                         |
| Participants                 | 13*     | (a) Report numbers of individuals at each stage of study—eg numbers potentially eligible, examined for eligibility, confirmed eligible, included in the study, completing follow-up, and analysed<br>(b) Give reasons for non-participation at each stage<br>(c) Consider use of a flow diagram                        | 9<br>9<br>N/A           |
| Descriptive data             | 14*     | (a) Give characteristics of study participants (eg demographic, clinical, social) and information on exposures and potential confounders<br>(b) Indicate number of participants with missing data for each variable of interest<br>(c) Summarise follow-up time (eg, average and total amount)                         | 9<br>21<br>11           |
| Outcome data                 | 15*     | Report numbers of outcome events or summary measures over time                                                                                                                                                                                                                                                         | 11                      |

|    |                          |    |                                                                                                                                                                                                              |    |
|----|--------------------------|----|--------------------------------------------------------------------------------------------------------------------------------------------------------------------------------------------------------------|----|
| 1  | Main results             | 16 | (a) Give unadjusted estimates and, if applicable, confounder-adjusted estimates and their precision (eg, 95% confidence interval). Make clear which confounders were adjusted for and why they were included | 9  |
| 2  |                          |    | (b) Report category boundaries when continuous variables were categorized                                                                                                                                    |    |
| 3  |                          |    | (c) If relevant, consider translating estimates of relative risk into absolute risk for a meaningful time period                                                                                             |    |
| 4  |                          |    |                                                                                                                                                                                                              |    |
| 5  |                          |    |                                                                                                                                                                                                              |    |
| 6  |                          |    |                                                                                                                                                                                                              |    |
| 7  |                          |    |                                                                                                                                                                                                              |    |
| 8  |                          |    |                                                                                                                                                                                                              |    |
| 9  | Other analyses           | 17 | Report other analyses done—eg analyses of subgroups and interactions, and sensitivity analyses                                                                                                               | 10 |
| 10 |                          |    |                                                                                                                                                                                                              |    |
| 11 | <b>Discussion</b>        |    |                                                                                                                                                                                                              |    |
| 12 |                          |    |                                                                                                                                                                                                              |    |
| 13 | Key results              | 18 | Summarise key results with reference to study objectives                                                                                                                                                     | 12 |
| 14 | Limitations              | 19 | Discuss limitations of the study, taking into account sources of potential bias or imprecision. Discuss both direction and magnitude of any potential bias                                                   | 14 |
| 15 |                          |    |                                                                                                                                                                                                              |    |
| 16 | Interpretation           | 20 | Give a cautious overall interpretation of results considering objectives, limitations, multiplicity of analyses, results from similar studies, and other relevant evidence                                   | 14 |
| 17 |                          |    |                                                                                                                                                                                                              |    |
| 18 |                          |    |                                                                                                                                                                                                              |    |
| 19 | Generalisability         | 21 | Discuss the generalisability (external validity) of the study results                                                                                                                                        | 14 |
| 20 |                          |    |                                                                                                                                                                                                              |    |
| 21 | <b>Other information</b> |    |                                                                                                                                                                                                              |    |
| 22 | Funding                  | 22 | Give the source of funding and the role of the funders for the present study and, if applicable, for the original study on which the present article is based                                                | 15 |
| 23 |                          |    |                                                                                                                                                                                                              |    |
| 24 |                          |    |                                                                                                                                                                                                              |    |

\*Give information separately for exposed and unexposed groups.

**Note:** An Explanation and Elaboration article discusses each checklist item and gives methodological background and published examples of transparent reporting. The STROBE checklist is best used in conjunction with this article (freely available on the Web sites of PLoS Medicine at <http://www.plosmedicine.org/>, Annals of Internal Medicine at <http://www.annals.org/>, and Epidemiology at <http://www.epidem.com/>). Information on the STROBE Initiative is available at <http://www.strobe-statement.org>.
