# Supplementary material for: Point-of-care lung ultrasonography for early identification of mild COVID-19: a prospective cohort of outpatients in a Swiss screening center
Source: PubMed Central journal article supplement (PMC9234434; doi:10.1136/bmjopen-2021-060181), 2022-06-23
Supplement: bmjopen-2021-060181supp001.pdf [file bmjopen-2021-060181supp001.pdf]

**Supplementary Tables.****Supplementary Table 1.** Characteristics of study participants comparing healthy controls and patients with a lower respiratory tract infection (COVID<sup>pos</sup> and COVID<sup>neg</sup>).

|                                | <b>All (n=178)</b> | <b>LRTI patients</b> | <b>Control patients</b> |       |
|--------------------------------|--------------------|----------------------|-------------------------|-------|
| Female sex                     | 112 (63)           | 84 (63)              | 28 (64)                 | 0.910 |
| Age, years; Median (IQR)       | 34 [28, 45]        | 35 [29, 46]          | 31 [25, 42]             | 0.007 |
| Pulmonary disease <sup>a</sup> | 3 (1.7)            | 3 (2.2)              | 0 (0)                   | 0.317 |
| Current cigarettes smoker      | 51 (29)            | 39 (29)              | 12 (27)                 | 0.816 |

Data are presented as n (%) unless otherwise indicated.

Missing values: 0

Abbreviations: IQR, interquartile range; LRTI, Lower respiratory tract infection

<sup>a</sup> COPD, fibrosis.

**Supplementary Table 2.** Lung ultrasound characteristics of study participants comparing healthy controls and patients with a lower respiratory tract infection (COVID<sup>pos</sup> and COVID<sup>neg</sup>).

|                                                           | <b>All<br/>(n=178)</b> | <b>LRTI patients<br/>(n=134)</b> | <b>Control patients<br/>(n=44)</b> |       |
|-----------------------------------------------------------|------------------------|----------------------------------|------------------------------------|-------|
| Abnormal lung ultrasound                                  | 45 (25)                | 41 (31)                          | 4 (9.1)                            | 0.004 |
| Abnormal lung ultrasound apart from focal B lines         | 31 (17)                | 30 (22)                          | 1 (2.2)                            | 0.002 |
| Multifocal                                                | 16 (9.0)               | 16 (12)                          | 0 (0)                              | 0.016 |
| Bilateral                                                 | 8 (4.5)                | 8 (6.0)                          | 0 (0)                              | 0.097 |
| Number of pathologic zones; Median (IQR)                  | 0 [0, 0.7]             | 0 [0, 1]                         | 0 [0, 0]                           | 0.003 |
| Pathologic B lines ( $\geq 3$ )                           | 23 (13)                | 20 (15)                          | 3 (6.8)                            | 0.164 |
| Confluent B lines (White lung)                            | 12 (6.7)               | 11 (8.2)                         | 1 (2.3)                            | 0.173 |
| Thickening of the pleura with pleural line irregularities | 18 (10)                | 18 (13)                          | 0 (0)                              | 0.010 |
| Consolidations ( $>1$ cm)                                 | 1 (0.6)                | 1 (0.8)                          | 0 (0)                              | 0.566 |
| Pleural effusion                                          | 0 (0)                  | 0 (0)                            | 0 (0)                              |       |
| LUS score; Median (IQR)                                   | 0 [0, 0.75]            | 0 [0, 1]                         | 0 [0, 0]                           | 0.003 |

Data are presented as n (%) unless otherwise indicated.

Abbreviations: IQR, interquartile range.

**Supplementary Table 3.** Lung ultrasound characteristics of study participants comparing healthy controls and COVID-19 patients

|                                                           | <b>All<br/>(n=75)</b> | <b>COVID-19 patients<br/>(n = 31)</b> | <b>Control patients<br/>(n = 44)</b> |         |
|-----------------------------------------------------------|-----------------------|---------------------------------------|--------------------------------------|---------|
| Abnormal lung ultrasound                                  | 18 (24.0)             | 14 (45)                               | 4 (9.1)                              | 0.001   |
| Abnormal lung ultrasound apart from focal B lines         | 10 (13)               | 9 (29)                                | 1 (2.2)                              | 0.003   |
| Multifocal                                                | 6 (8)                 | 6 (19)                                | 0 (0)                                | 0.009   |
| Bilateral                                                 | 3 (4)                 | 3 (9.7)                               | 0 (0)                                | 0.132   |
| Number of pathologic zones; Median (IQR)                  | 0 [0, 0]              | 0 [0, 1]                              | 0 [0, 0]                             | < 0.001 |
| Pathologic B lines ( $\geq 3$ )                           | 9 (12)                | 6 (19)                                | 3 (6.8)                              | 0.199   |
| Confluent B lines (White lung)                            | 5 (6.7)               | 4 (13)                                | 1 (2.3)                              | 0.178   |
| Thickening of the pleura with pleural line irregularities | 6 (8)                 | 6 (19)                                | 0 (0.0)                              | 0.009   |
| Consolidations (>1cm)                                     | 0 (0)                 | 0 (0)                                 | 0 (0)                                |         |
| Pleural effusion                                          | 0 (0)                 | 0 (0)                                 | 0 (0)                                |         |
| LUS score; Median (IQR)                                   | 0 [0, 0]              | 0 [0, 2.5]                            | 0 [0, 0]                             | <0.001  |

Data are presented as n (%) unless otherwise indicated.  
Abbreviations: IQR, interquartile range.
